# Supplementary material for: Utilization of COVID-19 Treatments and Clinical Outcomes among Patients with Cancer: A COVID-19 and Cancer Consortium (CCC19) Cohort Study
Source: Oxford University Press journal article supplement (doi:10.1158/2159-8290.cd-20-0941), 2020-07-22

**Supplementary Material**

Table of Contents

[Alphabetical list of participants by institution 2](#_Toc46087465)

[Precision Analysis 8](#_Toc46087466)

[Supplemental Table S1. Baseline demographic and clinical characteristics. 9](#_Toc46087467)

[Supplemental Table S2: Distribution of matched and unmatched cohorts stratified by exposure of interest (EOI) 12](#_Toc46087468)

[Supplemental Table S3: Goodness of fit and variance inflation factors. 13](#_Toc46087469)

[Supplemental Table S4: Racial and ethnic characteristics of patients receiving remdesivir. 14](#_Toc46087470)

[Supplemental Table S5: Descriptive statistics for each variable of the matched data (N=1322) 15](#_Toc46087471)

[Supplemental Table S6: Results of the logistic regression analysis with elastic-net and horeshoe regularization 16](#_Toc46087472)

[Supplemental Table S7: Results of the horseshoe regularization analysis conditional on baseline COVID-19 severity with 50% credible intervals. 18](#_Toc46087473)

[Supplemental Table S8: Results of mediation analysis. 19](#_Toc46087474)

[Supplemental Table S9: Additional covariates from the mortality models 20](#_Toc46087475)

[Supplementary Table S10: Data elements in the CCC19 data collection form. 23](#_Toc46087476)

[Supplementary Table S11: Derived variables. 29](#_Toc46087477)

[Supplemental Figure S1: UpSet plot of treatment exposures in hospitalized patients. 32](#_Toc46087478)

[Supplemental Figure S2: UpSet plot of treatment exposures in never-hospitalized patients. 33](#_Toc46087479)

[Supplemental Figure S3: Propensity score matching results 34](#_Toc46087480)

[Supplemental Figure S4: Determination of standard deviation for propensity score matching 35](#_Toc46087481)

# **Alphabetical list of participants by institution**

**Bolded = site PI/co-PIs)**; site co-Is are listed alphabetically by last name

**Keith Stockerl-Goldstein, MD**; Ryan Monahan, MBA; Alice Y. Zhou, MD, PhD (Alvin J. Siteman Cancer Center at Washington University School of Medicine and Barnes-Jewish Hospital, St. Louis, MO, USA)

**Balazs Halmos, MD**; **Amit K. Verma, MBBS**; Benjamin A. Gartrell, MD; Sanjay Goel, MBBS(Albert Einstein College of Medicine, Montefiore Medical Center, Bronx, NY, USA)

**Michael A. Thompson, MD, PhD, FASCO** (Aurora Cancer Care, Advocate Aurora Health, Milwaukee, WI, USA)

**Philip E. Lammers, MD, MSCI** (Baptist Cancer Center, Memphis, TN, USA)

**Susan Yackzan, PhD, APRN, AOCN** (Baptist Healthcare System, IN/KY, USA)

**Sanjay G. Revankar, MD, FIDSA** (The Barbara Ann Karmanos Cancer Institute at Wayne State University School of Medicine, Detroit, MI, USA)

**Ekokobe Fonkem, DO** (Barrow Neurological Institute, Phoenix, AZ, USA)

**Jonathan Loree, MD, MS, FRCPC**; Irene Yu, MD, FRCPC (BC Cancer, Vancouver, BC, Canada)

**Wenxin (Vincent) Xu, MD;** Jaymin M. Patel, MD (Beth Israel Deaconess Medical Center, Boston, MA, USA)

**Matthew H. Kulke, MD** (Boston Medical Center, Boston, MA, USA)

**Orestis A. Panagiotou, MD, PhD**; Pamela C. Egan, MD; Dimitrios Farmakiotis, MD; Hina Khan, MD; Adam J. Olszewski, MD (Brown University and Lifespan Cancer Institute, Providence, RI, USA)

**Arturo Loaiza-Bonilla, MD, MSEd, FACP** (Cancer Treatment Centers of America, AZ/GA/IL/OK/PA, USA)

**Salvatore A. Del Prete, MD**; Anne H. Angevine, MD; Michael H. Bar, MD, FACP; Anthony P. Gulati, MD; K. M. Steve Lo, MD; Jamie Stratton, MD; Paul L. Weinstein, MD (Carl & Dorothy Bennett Cancer Center at Stamford Hospital, Stamford, CT, USA)

**John M. Nakayama, MD**; Jill Barnholtz-Sloan, PhD; Paolo Caimi, MD; Jorge Garcia, MD (Case Comprehensive Cancer Center at Case Western Reserve University/University Hospitals, Cleveland, OH, USA)

**Bertrand Routy, MD, PhD** (Centre Hospitalier de l'Université de Montréal, Montreal, QC, Canada)

**Paul Fu, Jr., MD, MPH, FAAP, FAMIA**; Geoffrey Shouse, DO, PhD; Jack West, MD (City of Hope Comprehensive Cancer Center, Duarte, CA, USA)

**Shilpa Gupta, MD; Nathan A. Pennell, MD, PhD, FASCO**; Scott J. Dawsey, MD; Christopher A. Lemmon, MD (Cleveland Clinic, Cleveland, OH, USA)

**Ang Li, MD, MS** (Dan L Duncan Comprehensive Cancer Center at Baylor College of Medicine, Houston, TX, USA)

**Thomas Lad, MD** (Cook County Hospital, Chicago, IL, USA)

**Toni K. Choueiri, MD**; Ziad Bakouny, MD, MSc; Gabrielle Bouchard, BS; Fiona Busser, BA; Catherine Curran, BA; George D. Demetri, MD, FASCO; Kaitlin Kelleher, BA; Pier Vitale Nuzzo, MD, PhD; Andrew Schmidt, MD; Grace Shaw, BA; Jack (John) Steinharter, MS; Eli Van Allen, MD (Dana-Farber Cancer Institute, Boston, MA, USA)

**Tian Zhang, MD, MHS**; Susan Halabi, PhD, FASCO (Duke Cancer Institute at Duke University Medical Center, Durham, NC, USA)

**John C. Leighton Jr, MD, FACP** (Einstein Healthcare Network, Philadelphia, PA, USA)

**Andrea J. Zimmer, MD** (Fred and Pamela Buffett Cancer Center at Nebraska Medicine and the University of Nebraska Medical Center, Omaha, NE, USA)

**Gary H. Lyman, MD, MPH, FASCO, FRCP**; Petros Grivas, MD, PhD; Ali Raza Khaki, MD; Elizabeth T. Loggers, MD, PhD; Michael Schweizer, MD; Shaveta Vinayak, MD, MS; Michael Wagner, MD; Albert Yeh, MD (Fred Hutchinson Cancer Research Center/University of Washington/Seattle Cancer Care Alliance, Seattle, WA, USA)

**Na Tosha Gatson, MD, PhD** (Geisinger Health System, PA, USA)

**Stephen Liu, MD**; Subha Madhavan, PhD (Georgetown Lombardi Comprehensive Cancer Center at Georgetown University, Washington, DC, USA)

**Lori Rosenstein, MD** (Gundersen Health System, WI, USA)

**Aly-Khan A. Lalani, MD, FRCPC** (Hamilton Health Sciences, Hamilton, ON, Canada)

**Ankit Kansagra, MD** (Harold C. Simmons Comprehensive Cancer Center at the University of Texas Southwestern Medical Center, Dallas, TX, USA)

**Peter P. Yu, MD, FACP, FASCO**; Jessica M. Clement, MD; Ahmad Daher, MD; Mark Dailey, MD; Rawad Elias, MD; Emily Hsu, MD; Alvaro Menendez, MD; Joerg Rathmann, MD; Oscar Serrano, MD (Hartford HealthCare Cancer Institute, Hartford, CT, USA)

**Clara Hwang, MD**; Shirish M. Gadgeel, MD(Henry Ford Cancer Institute, Henry Ford Hospital, Detroit, MI, USA)

**Jessica Hawley, MD; Dawn Hershman, MD, MS, FASCO** (Herbert Irving Comprehensive Cancer Center at Columbia University, New York, NY, USA)

**Daniel Y. Reuben, MD**; Antonio Giordano, MD, PhD; Sara Matar, MD; Sarah Mushtaq, MD (Hollings Cancer Center at the Medical University of South Carolina, Charleston, SC, USA)

**Eric H. Bernicker, MD** (Houston Methodist Cancer Center, Houston, TX, USA)

**Heloisa P. Soares, MD, PhD;** Neeraj Agarwal, MD; Umang Swami, MD, MS (Huntsman Cancer Institute at the University of Utah, Salt Lake City, UT, USA)

**John Deeken, MD** (Inova Schar Cancer Institute, Fairfax, VA, USA)

**Mark A. Lewis, MD**; **Terence D. Rhodes, MD**; David M. Gill, MD; Clarke A. Low; MD (Intermountain Health Care, Salt Lake City, UT, USA)

**Sandeep H. Mashru, MD**; Abdul-Hai Mansoor, MD (Kaiser Permanente Northwest, OR/WA, USA)

**Sarah Nagle, MD**; Shannon McWeeney, PhD; Eneida R. Nemecek, MD, MS, MBA (Knight Cancer Institute at Oregon Health and Science University, Portland, OR, USA)

**Paul E. Oberstein, MD** (Laura and Isaac Perlmutter Cancer Center at NYU Langone Health, New York, NY, USA)

**Howard A. Zaren, MD, FACS** (Lewis Cancer & Research Pavilion @ St. Joseph's/Candler, Savannah, GA, USA)

**Gayathri Nagaraj, MD** (Loma Linda University Cancer Center, Loma Linda, CA, USA)

**Stephanie Berg, DO** (Loyola University Medical Center, Maywood, IL, USA)

**Alicia K. Morgans, MD, MPH; Firas Wehbe, MD, PhD**; Jessical Altman, MD; Michael Gurley, BA; Mary F. Mulcahy, MD (Lurie Cancer Center at Northwestern University, Chicago, IL, USA)

**Eric B. Durbin, DrPH, MS** (Markey Cancer Center at the University of Kentucky, Lexington, KY, USA)

**Amit A. Kulkarni, MD**; Heather H. Nelson, PhD, MPH (Masonic Cancer Center at the University of Minnesota, Minneapolis, MN, USA)

**Rachel P. Rosovsky, MD, MPH;** **Kerry Reynolds, MD**; Aditya Bardia, MD; Genevieve Boland, MD, PhD, FACS; Justin Gainor, MD; Leyre Zubiri, MD, PhD (Massachusetts General Hospital Cancer Center, Boston, MA, USA)

**Thorvardur R. Halfdanarson, MD**; Tanios Bekaii-Saab, MD; Zhuoer Xie, MD, MS (Mayo Clinic, AZ/FL/MN, USA)

**Ruben A. Mesa, MD, FACP**; Mark Bonnen, MD; Daruka Mahadevan, MD, PhD; Amelie Ramirez, DrPH, MPH; Mary Salazar, ANP; Dimpy Shah, MD, PhD (Mays Cancer Center at UT Health San Antonio MD Anderson Cancer Center, San Antonio, TX, USA)

**Nathaniel Bouganim, MD, FRCP(C)**; Arielle Elkrief, MD, FRCP(C); Donald C. Vinh, MD, FRCP(C) (McGill University Health Centre, Montreal, QC, Canada)

**Gregory J. Riely, MD, PhD**; **Elizabeth V. Robilotti MD, MPH**; Rimma Belenkaya, MA, MS; John Philip, MS (Memorial Sloan Kettering Cancer Center, New York, NY, USA)

**Rulla Tamimi, MS** (Meyer Cancer Center at Weill Cornell Medicine, New York, NY, USA)

Craig J. Gordon, DO (Michigan Center of Medical Research, Farmington Hills, MI, USA)

**Bryan Faller, MD** (Missouri Baptist Medical Center, St. Louis, MO, USA)

**Roohi Ismail-Khan, MD, MSc; Rohit K. Jain, MD, MPH** (Moffitt Cancer Center, Tampa, FL, USA)

**Rana R. McKay, MD**; Archana Ajmera, MSN, ANP-BC, AOCNP; Angelo Cabal, BS; Justin A. Shaya, MD (Moores Comprehensive Cancer Center at the University of California, San Diego, La Jolla, CA, USA)

**Lisa B. Weissmann, MD** (Mount Auburn Hospital, Cambridge, MA, USA)

**Jeanna Knoble, MD**; (Mary) Grace Glace, RN; Cameron Rink, PhD, MBA; Karen Stauffer, RN; Rosemary Zacks, RN (Mount Carmel Health System, Columbus, OH, USA)

**M. Wasif Saif, MD** (Northwell Health Cancer Institute, Zucker School of Medicine and Feinstein Institutes, Manhasset, NY, USA)

**Sibel Blau, MD** (Northwest Medical Specialties, Tacoma, WA, USA)

**Daniel G. Stover, MD**; James L. Chen, MD; Maryam B. Lustberg, MD, MPH; Sarah Wall, MD (The Ohio State University Comprehensive Cancer Center, Columbus, OH, USA)

**Melanie Clark, MD** (Parkview Research Center, Fort Wayne, IN, USA)

**Monika Joshi, MD, MRCP; Harry Menon, DO, MPH**; Marc A. Rovito, MD, FACP (Penn State Health/Penn State Cancer Institute/St. Joseph Cancer Center, PA, USA)

**Elizabeth A. Griffiths, MD**; Amro Elshoury, MBBCh (Roswell Park Comprehensive Cancer Center, Buffalo, NY, USA)

**Janice M. Mehnert, MD**; Salma Jabbour, MD; Mansi Shah, MD (Rutgers Cancer Institute of New Jersey at Rutgers Biomedical and Health Sciences, New Brunswick, NJ, USA)

**Gerald Batist, MD, FACP, FRCP(C);** Erin Cook(Segal Cancer Centre, Jewish General Hospital, McGill University, Montreal, QC, Canada)

**Babar Bashir, MD, MS**; Christopher McNair, PhD; Vasil Mico(Sidney Kimmel Cancer Center at Thomas Jefferson University, Philadelphia, PA, USA)

**Catherine Handy Marshall, MD, MPH**; Nilo Azad, MD; Marcus Messmer, MD; Jarushka Naidoo, MBBCh (Sidney Kimmel Comprehensive Cancer Center at Johns Hopkins University, Baltimore, MD, USA)

**Amit Sanyal, MD** (SSM Health Cancer Care, St. Charles, MO, USA)

**Sumit A. Shah, MD, MPH**; Michael J. Glover, MD; Alokkumar Jha, PhD; Lidia Schapira, MD, FASCO; Julie T. Y. Wu, MD, PhD (Stanford Cancer Institute at Stanford University, Palo Alto, CA, USA)

**Suki Subbiah, MD** (Stanley S. Scott Cancer Center at LSU Health Sciences Center, New Orleans, LA, USA)

**Daniel Flora, MD**; Barbara Logan, MS (St. Elizabeth Healthcare, Edgewood, KY, USA)

**Gilberto de Lima Lopes Jr., MD, MBA, FAMS, FASCO** (Sylvester Comprehensive Cancer Center at the University of Miami Miller School of Medicine, Miami, FL, USA)

**Karen Russell, MD, FACP**; Brittany Stith, RN, BSN, OCN, CCRP (Tallahassee Memorial Healthcare, Tallahassee, FL, USA)

**Matthias Weiss, MD, PhD** (ThedaCare Cancer Care, Appleton, WI, USA)

**David Chism, MD**; Susie Owenby, RN, CCRP (Thompson Cancer Survival Center, Knoxville, TN, USA)

**Deborah B. Doroshow, MD, PhD**; Matthew D. Galsky, MD (Tisch Cancer Institute at the Icahn School of Medicine at Mount Sinai, New York, NY, USA)

**Julie Fu, MD** (Tufts Medical Center Cancer Center, Boston and Stoneham, MA, USA)

**Jonathan Riess, MD, MS** (UC Davis Comprehensive Cancer Center at the University of California at Davis, CA, USA)

**Vadim S. Koshkin, MD** (UCSF Helen Diller Family Comprehensive Cancer Center at the University of California at San Francisco, CA, USA)

**William A. Wood, MD, MPH** (UNC Lineberger Comprehensive Cancer Center, Chapel Hill, NC, USA)

**Christine Bestvina , MD**; Ardaman Shergill, MD (The University of Chicago Comprehensive Cancer Center, Chicago, IL, USA)

**Trisha Wise-Draper, MD, PhD**; Syed Ahmad, MD; Shuchi Gulati, MD; Jordan Kharofa, MD; Michelle Marcum, MS (University of Cincinnati Cancer Center, Cincinnati, OH, USA)

**Daniel W. Bowles, MD**; Maheen Abidi, MD (University of Colorado Cancer Center, Aurora, CO, USA)

**Pramod K. Srivastava, MD, PhD**; Aakash Desai, MD, MPH; Emily Hsu, MD (University of Connecticut, Farmington, CT, USA)

**Merry-Jennifer Markham, MD, FACP, FASCO**; Rohit Bishnoi, MD; Chintan Shah, MD (University of Florida Health Cancer Center, Gainesville, FL, USA)

**Jared D. Acoba, MD**; Young Soo Rho, MD, CM (University of Hawai'i Cancer Center, Honolulu, HI, USA)

**Lawrence E. Feldman, MD**; **Kent Hoskins, MD**; Gerald Gantt Jr., MD; Mahir Khan, MD; Ryan Nguyen, DO; Mary Pasquinelli, APN, DNP; Candice Schwartz, MD; Neeta Venepalli, MD (University of Illinois Hospital & Health Sciences System, Chicago, IL, USA)

**Praveen Vikas, MD** (University of Iowa Holden Comprehensive Cancer Center, Iowa City, IA, USA)

**Elizabeth Wulff-Burchfield, MD;** Anup Kasi MD, MPH (The University of Kansas Cancer Center, Kansas City, KS, USA)

**Robert C.G. Martin, II, MD, PhD, FACS;** Neal Bhutiani, MD, PhD (University of Louisville James Graham Brown Cancer Center, Louisville, KY, USA)

**Saurabh Dahiya, MBBS, FACP** (University of Maryland Marlene and Stewart Greenebaum Comprehensive Cancer Center, Baltimore, MD, USA)

**Christopher R. Friese, PhD, RN, AOCN, FAAN**; Leslie A. Fecher, MD (University of Michigan Rogel Cancer Center, Ann Arbor, MI, USA)

**Talal Hilal, MD** (University of Mississippi Medical Center, Jackson, MS, USA)

**Carla Casulo, MD** (University of Rochester Medical Center, Rochester, NY, USA)

**Andy Futreal, BS, PhD**; **Vivek Subbiah, MD**; Vikram Narayan, MD; Sabitha Prabhakaran, PhD; Sanjay S. Shete, PhD; Nizar M. Tannir, MD, FACP (The University of Texas MD Anderson Cancer Center, Houston, TX, USA)

**Narjust Duma, MD** (University of Wisconsin Carbone Cancer Center, Madison, WI, USA)

**Blanche H. Mavromatis, MD;** Qamar U. Zaman, MD (UPMC Western Maryland, Cumberland, MD, USA)

**Jeremy L. Warner, MD, MS, FAMIA, FASCO**; Erin A. Gillaspie, MD, MPH; Daniel Hausrath, MD; Douglas B. Johnson, MD, MSCI; Xuanyi Li, BA; Sanjay Mishra, MS, PhD; Sonya A. Reid, MBBS, MPH; Brian I. Rini, MD, FACP, FASCO; Samuel M. Rubinstein, MD; Yu Shyr, PhD; Carmen C. Solorzano, MD, FACS; Matthew Tucker, MD; Karen Vega-Luna (Vanderbilt-Ingram Cancer Center at Vanderbilt University Medical Center, Nashville, TN, USA)

**Hagen F. Kennecke, MD, MHA, FRCPC;** David Aboulafia, MD (Virginia Mason Cancer Institute, Seattle, WA, USA)

**Matthew Puc, MD**; Theresa Carducci, MSN, RN, CCRP; Sandy DiLullo, BSN, RN, CCRP; Susan Van Loon, RN, CTR, CCRP (Virtua Health, Marlton, NJ, USA)

**Umit Topaloglu, PhD, FAMIA** (Wake Forest Baptist Comprehensive Cancer Center, Winston-Salem, NC, USA)

**Robert L. Rice, MD, PhD** (WellSpan Health, York, PA, USA)

**Christine Pilar, BS, CCRC, ACRP-PM** (Wentworth-Douglass Hospital, Dover, NH, USA)

**Axel Grothey, MD** (West Cancer Center, Memphis, TN, USA)

**Prakash Peddi, MD**; **Lane Rosen, MD**; Briana Barrow, BSc, CCRC (Willis-Knighton Cancer Center, Shreveport, LA, USA)

**Mehmet Asim Bilen, MD** (Winship Cancer Institute of Emory University, Atlanta, GA, USA)

**Navid Hafez, MD, MPH**; Roy Herbst, MD, PhD; Patricia LoRusso, DO, PhD; Tyler Masters, MS; Catherine Stratton, BA (Yale Cancer Center at Yale University School of Medicine, New Haven, CT, USA)

**Raju Vaddepally, MD** (Yuma Regional Medical Center, Yuma, AZ, USA)

# **Precision Analysis**

The precision analysis was completed using the 5,000 computer simulations based on the generalized linear model (GLM).

*Observed data:*

|  | Negative control | Positive control | HCQ alone | HCQ + anything |
| --- | --- | --- | --- | --- |
| Sample size | 1321 | 327 | 179 | 359 |
| Mortality | 115 | 59 | 44 | 111 |
| Mortality rate | 0.09 | 0.18 | 0.25 | 0.31 |

Taking HCQ alone vs negative control as an example, we first generated 179 binary outcomes with the mortality rate of 0.25 for HCQ alone group and generated 1,321 binary outcomes with the mortality rate of 0.09 for the negative control group. Then, we performed the logistic regression analysis to estimate the odds ratio (OR) of HCQ alone vs negative control. Replicating the procedure 5,000 times, we obtained 5,000 ORs, ORs’ average and 95% confidence interval. Below are the simulation results.

Ratio of standard error (SE) of estimated OR to estimated OR [mean, 95% CI] is from logistic regression analysis based on 5,000 replications. SE of estimated OR is obtained using the Delta method, i.e., exp(beta.hat)*se(beta.hat).

|  | Negative control | Positive control | HCQ alone | HCQ + anything |
| --- | --- | --- | --- | --- |
| Negative control |  |  |  |  |
| Positive control | 0.17 (0.16-0.19) |  |  |  |
| HCQ alone | 0.20 (0.19-0.21) | 0.23 (0.21-0.24) |  |  |
| HCQ + anything | 0.15 (0.14-0.16) | 0.18 (0.18-0.20) | 0.21 (0.20-0.22) |  |

# **Supplemental Table S1. Baseline demographic and clinical characteristics.**

|  | All patients | Hydroxy-chloroquine | Azithromycin | Remdesivir | High-dose systemic cortico-steroids | Tocilizumab | Other COVID-19 treatmentse | No treatment |
| --- | --- | --- | --- | --- | --- | --- | --- | --- |
| **Total** | 2186 (100) | 538 (25) | 485 (22) | 124 (6) | 109 (5) | 94 (4) | 90 (4) | 1321 (60) |
| **On clinical triala** | 134 (6) | 7 (1) | 2 (<1) | 86 (69) | 0 (0) | 5 (5) | 37 (41) | N/A |
| **Age** |  |  |  |  |  |  |  |  |
| Median, IQR | 67, 57-77 | 70, 61-79 | 69, 60-78 | 68, 58-76 | 69, 61-77 | 67.5, 61-77 | 69.5, 61-76 | 65, 54-76 |
| <65 | 956 (44) | 181 (34) | 183 (38) | 50 (40) | 41 (38) | 36 (38) | 30 (33) | 646 (49) |
| 65-74 | 559 (26) | 161 (30) | 133 (27) | 40 (32) | 32 (29) | 31 (33) | 34 (38) | 311 (24) |
| 75+ | 671 (31) | 196 (36) | 169 (35) | 34 (27) | 36 (33) | 27 (29) | 26 (29) | 364 (28) |
| **Sex** |  |  |  |  |  |  |  |  |
| Female | 1105 (51) | 241 (45) | 221 (46) | 54 (44) | 55 (50) | 43 (46) | 34 (38) | 706 (53) |
| Male | 1078 (49) | 297 (55) | 264 (54) | 70 (56) | 54 (50) | 51 (54) | 56 (62) | 612 (46) |
| Missing | 3 (<1) |  |  |  |  |  |  | 3 (<1) |
| **Race/ethnicity** |  |  |  |  |  |  |  |  |
| Non-Hispanic White | 1115 (51) | 247 (46) | 257 (53) | 65 (52) | 47 (43) | 44 (47) | 46 (51) | 693 (52) |
| Hispanic | 334 (15) | 76 (14) | 56 (12) | 25 (20) | 10 (9) | 9 (10) | 13 (14) | 217 (16) |
| Non-Hispanic Black | 476 (22) | 152 (28) | 126 (26) | 18 (15) | 37 (34) | 31 (33) | 23 (26) | 247 (19) |
| Other | 200 (9) | 56 (10) | 39 (8) | 8 (6) | 12 (11) | 7 (7) | 4 (4) | 120 (9) |
| Missing | 61 (3) | 7 (1) | 7 (1) | 8 (6) | 3 (3) | 3 (3) | 4 (4) | 44 (3) |
| **Region of patient residence** |  |  |  |  |  |  |  |  |
| US-Northeast | 1011 (46) | 289 (54) | 234 (48) | 58 (47) | 47 (43) | 53 (56) | 45 (50) | 574 (43) |
| US-Midwest | 597 (27) | 147 (27) | 143 (29) | 25 (20) | 42 (39) | 29 (31) | 27 (30) | 357 (27) |
| US-South | 275 (13) | 66 (12) | 74 (15) | 16 (13) | 11 (10) | 8 (9) | 10 (11) | 168 (13) |
| US-West | 303 (14) | 36 (7) | 34 (7) | 25 (20) | 9 (8) | 4 (4) | 8 (9) | 222 (17) |
| **Smoking Status** |  |  |  |  |  |  |  |  |
| Never | 1149 (53) | 246 (46) | 241 (50) | 64 (52) | 41 (38) | 42 (45) | 41 (46) | 731 (55) |
| Current or Former | 958 (44) | 275 (51) | 231 (48) | 53 (43) | 64 (59) | 46 (49) | 46 (51) | 541 (41) |
| Missing | 79 (4) | 17 (3) | 13 (3) | 7 (6) | 4 (4) | 6 (6) | 3 (3) | 49 (4) |
| **Comorbidities** |  |  |  |  |  |  |  |  |
| Obesity | 705 (32) | 183 (34) | 178 (37) | 48 (39) | 50 (46) | 48 (51) | 35 (39) | 394 (30) |
| Diabetes mellitus | 643 (29) | 209 (39) | 175 (36) | 39 (31) | 38 (35) | 35 (37) | 25 (28) | 338 (26) |
| Hypertension | 1258 (58) | 377 (70) | 320 (66) | 82 (66) | 68 (62) | 70 (74) | 63 (70) | 675 (51) |
| Pulmonary | 471 (22) | 147 (27) | 127 (26) | 36 (29) | 39 (36) | 25 (27) | 25 (28) | 239 (18) |
| Cardiovascular | 709 (32) | 198 (37) | 176 (36) | 44 (35) | 43 (39) | 38 (40) | 33 (37) | 396 (30) |
| Renal | 389 (18) | 135 (25) | 110 (23) | 11 (9) | 24 (22) | 17 (18) | 17 (19) | 198 (15) |
| **ECOG Performance Status** |  |  |  |  |  |  |  |  |
| 0 | 749 (34) | 133 (25) | 143 (29) | 44 (35) | 23 (21) | 22 (23) | 23 (26) | 515 (39) |
| 1 | 563 (26) | 175 (33) | 131 (27) | 30 (24) | 31 (28) | 30 (32) | 31 (34) | 311 (24) |
| 2+ | 352 (16) | 97 (18) | 61 (13) | 16 (13) | 21 (19) | 16 (17) | 12 (13) | 202 (15) |
| Unknown | 506 (23) | 127 (24) | 143 (29) | 34 (27) | 33 (30) | 26 (28) | 23 (26) | 284 (21) |
| Missing | 16 (1) | 6 (1) | 7 (1) |  | 1 (1) |  | 1 (1) | 9 (1) |
| **Malignancy typeb** |  |  |  |  |  |  |  |  |
| Solid tumors | 1781 (81) | 417 (78) | 390 (80) | 89 (72) | 85 (78) | 63 (67) | 60 (67) | 1107 (84) |
| Breast | 455 (21) | 94 (17) | 93 (19) | 15 (12) | 20 (18) | 13 (14) | 8 (9) | 297 (22) |
| Prostate | 368 (17) | 103 (19) | 87 (18) | 18 (15) | 17 (16) | 12 (13) | 17 (19) | 212 (16) |
| Gastrointestinal | 290 (13) | 67 (12) | 62 (13) | 17 (14) | 12 (11) | 12 (13) | 10 (11) | 186 (14) |
| Thoracic | 169 (8) | 54 (10) | 39 (8) | 9 (7) | 13 (12) | 11 (12) | 7 (8) | 90 (7) |
| Gynecologic | 143 (7) | 31 (6) | 31 (6) | 7 (6) | 7 (6) | 3 (3) | 5 (6) | 93 (7) |
| Solid tumors, NOS | 506 (23) | 105 (20) | 107 (22) | 30 (24) | 25 (23) | 19 (20) | 21 (23) | 320 (24) |
| Hematologic malignancies | 470 (22) | 141 (26) | 114 (24) | 38 (31) | 27 (25) | 36 (38) | 32 (36) | 251 (19) |
| Lymphoid neoplasms | 272 (12) | 82 (15) | 68 (14) | 23 (19) | 13 (12) | 19 (20) | 19 (21) | 146 (11) |
| Plasma cell disorders | 95 (4) | 34 (6) | 27 (6) | 10 (8) | 10 (9) | 11 (12) | 11 (12) | 42 (3) |
| Myeloid neoplasms | 98 (4) | 25 (5) | 19 (4) | 5 (4) | 5 (5) | 6 (6) | 2 (2) | 57 (4) |
| Hematologic malignancy, NOS | 12 (1) | 1 (<1) | 1 (<1) | 1 (1) | 0 (0) | 0 (0) | 1 (1) | 10 (1) |
| **Cancer Status** |  |  |  |  |  |  |  |  |
| Remission/NED | 1115 (51) | 258 (48) | 261 (54) | 61 (49) | 48 (44) | 36 (38) | 42 (47) | 682 (52) |
| Active, progressing | 239 (11) | 70 (13) | 52 (11) | 15 (12) | 21 (19) | 16 (17) | 8 (9) | 135 (10) |
| Active, stable/responding | 607 (28) | 149 (28) | 124 (26) | 36 (29) | 24 (22) | 31 (33) | 27 (30) | 375 (28) |
| Unknown | 214 (10) | 60 (11) | 47 (10) | 11 (9) | 16 (15) | 11 (12) | 13 (14) | 120 (9) |
| Missing | 11 (1) | 1 (<1) | 1 (<1) | 1 (1) |  |  |  | 9 (1) |
| **Active cancer treatmentc** |  |  |  |  |  |  |  |  |
| None | 1457 (67) | 359 (67) | 338 (70) | 77 (62) | 72 (66) | 56 (60) | 63 (70) | 866 (66) |
| Cytotoxic | 269 (12) | 69 (13) | 56 (12) | 19 (15) | 7 (6) | 8 (9) | 6 (7) | 165 (12) |
| Non-cytotoxic | 424 (19) | 102 (19) | 84 (17) | 24 (19) | 25 (23) | 28 (30) | 19 (21) | 268 (20) |
| Unknown | 36 (2) | 8 (1) | 7 (1) | 4 (3) | 5 (5) | 2 (2) | 2 (2) | 22 (2) |
| **Baseline COVID-19 severity** |  |  |  |  |  |  |  |  |
| Mild | 1037 (47) | 60 (11) | 121 (25) | 13 (10) | 22 (20) | 14 (15) | 10 (11) | 876 (66) |
| Moderate | 876 (40) | 356 (66) | 259 (53) | 70 (56) | 61 (56) | 47 (50) | 51 (57) | 360 (27) |
| Severe | 273 (12) | 122 (23) | 105 (22) | 41 (33) | 26 (24) | 33 (35) | 29 (32) | 85 (6) |
| **Concomitant medications** |  |  |  |  |  |  |  |  |
| Aspirin or other antiplatelet agents | 682 (31) | 191 (36) | 194 (40) | 52 (42) | 44 (40) | 37 (39) | 33 (37) | 364 (28) |
| Anticoagulation | 1087 (50) | 414 (77) | 353 (73) | 104 (84) | 91 (83) | 79 (84) | 76 (84) | 456 (35) |
| Statins | 927 (42) | 265 (49) | 244 (50) | 64 (52) | 59 (54) | 46 (49) | 39 (43) | 505 (38) |
| Low-dose steroidsd | 184 (8) | 55 (10) | 42 (9) | 22 (18) | 14 (13) | 12 (13) | 11 (12) | 94 (7) |

aFor all patients, this is the number of patients on any trial for treatment of COVID-19. For each specific exposure, this is the number of patients reported to be on a trial of that particular treatment.

bPercentages may add up to more than 100 because some patients had multiple malignancies.

cDefined as receipt of antineoplastic therapy within four (4) weeks of COVID-19 diagnosis.

dDefined as up to 20 mg/day in prednisone dose equivalents.

eIncludes patients enrolled in blinded randomized controlled trials e.g., of remdesivir.

* Percentages are shown in parentheses; percentages may not add up to 100 due to rounding.

**Supplemental Table S2****: Distribution of matched and unmatched cohorts stratified by exposure of interest (EOI)**; percentages may not add up to 100 due to rounding. HCQ: hydroxychloroquine; PSM: Propensity score matching

| **Characteristic** | **HCQ with PSM, n (%)a** | **HCQ unmatched, n (%)** | **HCQ without severe cases, n (%)** | **HCQ, active cancer only, n (%)** | **Remdesivir, n (%)** | **High-dose sytemic corticosteroids, n (%)** |
| --- | --- | --- | --- | --- | --- | --- |
| EOI alone | 179 (14) | 179 (8) | 151 (8) | 69 (8) | 57 (3) | 18 (1) |
| EOI + any other exposure | 359 (27) | 359 (16) | 265 (14) | 150 (18) | 67 (3) | 91 (4) |
| Negative controls | 544 (41) | 1321 (60) | 1236 (65) | 510 (60) | 1321 (60) | 1321 (60) |
| Positive controls | 240 (18) | 327 (15) | 261 (14) | 117 (14) | 741 (34) | 756 (35) |
| **Total** | **1322 (100)** | **2186 (100)** | **1913 (100)** | **846 (100)** | **2186 (100)** | **2186 (100)** |

aThis is a representative sample of one of the ten runs of the model; exact numbers of positive and negative controls fluctuate slightly across runs due to multiple data imputation.

# **Supplemental Table S3: Goodness of fit and variance inflation factors.**

| **Model** | **C-statistic** | **Number of variables with VIF > 5** |
| --- | --- | --- |
| Predictors of HCQ+AZ treatment | 0.72 | 0 |
| Predictors of remdesivir treatment | 0.70 | 0 |
| Predictors of any COVID-19 treatment | 0.75 | 0 |
| Predictors of mortality in HCQ-exposed patients, PSM | 0.79 | 0 |
| Predictors of mortality in HCQ-exposed patients, unmatched | 0.86 | 0 |
| Predictors of mortality in HCQ-exposed patients, without severe cases | 0.86 | 0 |
| Predictors of mortality in HCQ-exposed patients, active cancer only | 0.86 | 0 |
| Predictors of mortality in HCQ-exposed patients, remission/NED only | 0.88 | 0 |
| Predictors of mortality in remdesivir-exposed patients | 0.86 | 0 |
| Predictors of mortality in high-dose systemic corticosteroid-exposed patients | 0.86 | 0 |

# **Supplemental Table S4: Racial and ethnic characteristics of patients receiving remdesivir.**

|  | **Non-Hispanic white** | **Non-Hispanic Black** | **Hispanic** | **Other** | **Missing** |
| --- | --- | --- | --- | --- | --- |
| On trial | 44 | 13 | 16 | 8 | 5 |
| Off trial1 | 21 | 5 | 9 | 0 | 3 |

1Includes compassionate use prior to May 1, 2020 and emergency use authorization (EUA) after May 1, 2020; limits of temporal resolution in the CCC19 registry do not allow for distinguishing between these two uses.

**Supplemental Table S5: Descriptive statistics for each variable of the matched data (N=1322)**. This table is from one of the ten model runs; absolute numbers change very slightly from run to run and are averaged in the model output. Absolute numbers are shown in parentheses.

|  | **Negative control**  **(N=544)** | **Positive control**  **(N=240)** | **HCQ alone**  **(N=179)** | **HCQ + any other exposure**  **(N=359)** |
| --- | --- | --- | --- | --- |
| **Death** | 0.19 (101) | 0.22 (54) | 0.25 (44) | 0.31 (111) |
| **Age, median (IQR)** | 71 (60-81) | 70 (60-80) | 73 (64.5-81.5) | 69 (60.5-77) |
| **Sex** |  |  |  |  |
| Male | 0.50 (271) | 0.54 (129) | 0.53 (94) | 0.57 (203) |
| **Race** |  |  |  |  |
| Non-Hispanic White | 0.52 (285) | 0.53 (128) | 0.41 (74) | 0.49 (176) |
| Hispanic | 0.14 (74) | 0.13 (31) | 0.18 (32) | 0.13 (47) |
| Non-Hispanic Black | 0.25 (136) | 0.24 (57) | 0.26 (46) | 0.30 (106) |
| Other | 0.09 (49) | 0.10 (24) | 0.15 (27) | 0.08 (30) |
| **Region** |  |  |  |  |
| US Northeast | 0.49 (264) | 0.47 (112) | 0.63 (112) | 0.49 (177) |
| US Midwest | 0.27 (147) | 0.27 (64) | 0.21 (38) | 0.30 (109) |
| US South | 0.13 (73) | 0.13 (31) | 0.07 (12) | 0.15 (54) |
| US West | 0.11 (60) | 0.14 (33) | 0.09 (17) | 0.05 (19) |
| **Smoking** |  |  |  |  |
| Current or Former | 0.47 (257) | 0.49 (117) | 0.53 (95) | 0.53 (189) |
| **Obesity** | 0.29 (159) | 0.36 (87) | 0.27 (49) | 0.37 (134) |
| **Diabetes mellitus** | 0.33 (181) | 0.32 (76) | 0.38 (68) | 0.40 (142) |
| **Pulm. comorbidities** | 0.24 (129) | 0.25 (61) | 0.23 (41) | 0.30 (107) |
| **Card. comorbidities** | 0.41 (224) | 0.40 (97) | 0.37 (67) | 0.36 (131) |
| **Renal comorbidities** | 0.21 (113) | 0.20 (47) | 0.27 (48) | 0.24 (87) |
| **Hypertension** | 0.62 (340) | 0.68 (164) | 0.72 (129) | 0.69 (248) |
| **ECOG performance** |  |  |  |  |
| 0 | 0.26 (141) | 0.29 (69) | 0.22 (39) | 0.27 (96) |
| 1 | 0.25 (137) | 0.25 (61) | 0.33 (59) | 0.33 (119) |
| 2+ | 0.24 (131) | 0.18 (43) | 0.26 (47) | 0.14 (50) |
| Unknown | 0.25 (135) | 0.28 (67) | 0.19 (34) | 0.26 (94) |
| **Cancer status** |  |  |  |  |
| Remission/NED | 0.49 (266) | 0.50 (121) | 0.49 (87) | 0.48 (171) |
| Active, progressing | 0.13 (72) | 0.12 (29) | 0.12 (21) | 0.14 (49) |
| Active, stable/responding | 0.26 (144) | 0.26 (63) | 0.27 (48) | 0.28 (102) |
| Unknown | 0.11 (62) | 0.11 (27) | 0.13 (23) | 0.10 (37) |
| **Baseline COVID-19 severity** |  |  |  |  |
| Mild | 0.20 (109) | 0.08 (18) | 0.07 (13) | 0.13 (47) |
| Moderate | 0.64 (350) | 0.65 (157) | 0.77 (138) | 0.61 (218) |
| Severe | 0.16 (85) | 0.27 (65) | 0.16 (28) | 0.26 (94) |
| **Anticoagulants or antiplatelet agents** | 0.76 (414) | 0.87 (209) | 0.77 (137) | 0.87 (312) |

**Supplemental Table S6: Results of the logistic regression analysis with elastic-net and horeshoe regularization**. Elastic-net regularization was performed with a mixing parameter of 0.5; horseshoe regularization with 50% credible intervals. A standard deviation of 0.3 was used in the two-group matching.

| **Characteristic** | **Multivariable AOR (95% CI)**  **Elastic-net** | **Multivariable AOR (95% CI)**  **Horseshoe** |
| --- | --- | --- |
| **Treatment group** |  |  |
| Negative control | Reference | Reference |
| Positive control | 1.09 (0.72-1.65) | 1.11 (0.73-1.68) |
| HCQ alone | 1.19 (0.76-1.86) | 1.18 (0.75-1.84) |
| HCQ + any other exposure | 2.16 (1.52-3.09) | 2.20 (1.53-3.15) |
| **Age, per decade** | 1.31 (1.50-1.72) | 1.37 (1.57-1.81) |
| **Sex** |  |  |
| Female | Reference | Reference |
| Male | 1.22 (0.91-1.63) | 1.26 (0.94-1.69) |
| **Region** |  |  |
| US Northeast | Reference | Reference |
| US Midwest | 0.64 (0.45-0.91) | 0.65 (0.45-0.92) |
| US South | 0.68 (0.43-1.09) | 0.70 (0.44-1.11) |
| US West | 0.81 (0.47-1.41) | 0.80 (0.46-1.39) |
| **Smoking status** |  |  |
| Never | Reference | Reference |
| Current or Former | 1.18 (0.86-1.61) | 1.20 (0.88-1.63) |
| **Obesity** |  |  |
| Non-Obese | Reference | Reference |
| Obese |  | 1.32 (0.96-1.81) |
| **Renal comorbidities** |  |  |
| 0 | Reference | Reference |
| 1 | 1.17 (0.85-1.61) |  |
| **Hypertension** |  |  |
| 0 | Reference | Reference |
| 1 | 1.17 (0.84-1.62) |  |
| **ECOG performance status** |  |  |
| 0 | Reference | Reference |
| 1 | 1.51 (0.95-2.39) | 1.55 (0.98-2.45) |
| 2+ | 3.94 (2.48-6.27) | 4.07 (2.55-6.48) |
| Unknown | 2.04 (1.29-3.23) | 2.13 (1.34-3.38) |
| **Cancer status** |  |  |
| Remission/NED | Reference | Reference |
| Active, progressing | 2.55 (1.63-4.00) | 2.48 (1.58-3.90) |
| Active, stable/responding | 1.42 (0.98-2.06) | 1.42 (0.98-2.06) |
| Unknown | 1.46 (0.93-2.29) | 1.44 (0.91-2.27) |
| **Baseline COVID-19 severity** |  |  |
| Mild | Reference | Reference |
| Moderate | 2.16 (1.07-4.38) | 2.32 (1.14-4.74) |
| Severe | 7.75 (3.72-16.16) | 8.39 (3.99-17.62) |
| **Anticoagulants or antiplatelet agents** |  |  |
| Unexposed | Reference | Reference |
| Exposed |  | 0.72 (0.48-1.10) |

**Supplemental Table S7: Results of the horseshoe regularization analysis conditional on baseline COVID-19 severity with 50% credible intervals.** A standard deviation of 0.3 was used in the two-group matching.

| **Characteristic** | **Multivariable AOR (95% CI)** | |
| --- | --- | --- |
|  | **“Moderate”** | **“Moderate + Severe”** |
| **Treatment group** |  |  |
| Negative control | Reference | Reference |
| Positive control | **1.22 (0.71-2.11)** | **1.18 (0.77-1.81)** |
| HCQ alone | **1.26 (0.73-2.19)** | **1.01 (0.63-1.60)** |
| HCQ + any other exposure | **3.04 (1.91-4.86)** | **2.20 (1.51-3.19)** |
| **Age, per 10 years** | 1.36 (1.62-1.93) | 1.31 (1.50-1.73) |
| **Sex** |  |  |
| Female | Reference | Reference |
| Male | 1.17 (0.81-1.69) | 1.29 (0.95-1.74) |
| **Region** |  |  |
| US Northeast | Reference | Reference |
| US Midwest | 0.58 (0.37-0.92) | 0.63 (0.43-0.91) |
| US South | 0.71 (0.38-1.34) | 0.76 (0.47-1.22) |
| US West | 0.91 (0.42-1.97) | 0.98 (0.56-1.69) |
| **Obesity** |  |  |
| Non-Obese | Reference | Reference |
| Obese | 1.78 (1.18-2.69) | 1.47 (1.06-2.03) |
| **ECOG performance status** |  |  |
| 0 | Reference | Reference |
| 1 | 1.67 (0.87-3.23) | 1.29 (0.80-2.09) |
| 2+ | 5.07 (2.60-9.88) | 3.75 (2.32-6.05) |
| Unknown | 2.96 (1.51-5.78) | 1.86 (1.15-3.01) |
| **Cancer status** |  |  |
| Remission/NED | Reference | Reference |
| Active, progressing | 3.10 (1.79-5.35) | 2.21 (1.40-3.48) |
| Active, stable/responding | 1.80 (1.13-2.87) | 1.36 (0.92-2.00) |
| Unknown | 1.53 (0.82-2.87) | 1.52 (0.95-2.43) |
| **Anticoagulants or antiplatelet agents** |  |  |
| Unexposed |  | Reference |
| Exposed |  | 0.76 (0.49-1.17) |

**Supplemental Table S8: Results of mediation analysis.** Mediator: binary variable (Negative control + positive control vs. HCQ alone + HCQ plus other drugs). Independent variable: baseline COVID-19 severity (treated as a binary variable); Outcome: mortality. ACME: Average Causal Mediation Effects; ADE: Average Direct Effect

|  | **Estimate (95% CI)** |
| --- | --- |
| ACME (treated) | 0.0060 (-0.0003-0.02) |
| ADE (treated) | 0.1591 (0.1033-0.21) |
| Total Effect | 0.1612 (0.1082-0.21) |
| Prop. Mediated (treated) | 0.0369 (-0.0016-0.12) |

# **Supplemental Table S9: Additional covariates from the mortality models**

| **Characteristic** | **HCQ with PSM, AOR (95% CI)** | **HCQ, AOR (95% CI)a** | **HCQ without severe cases, AOR (95% CI)a** | **Remdesivir, AOR (95% CI)a** | **High-dose sytemic corticosteroids, AOR (95% CI)a** |
| --- | --- | --- | --- | --- | --- |
| **Ageb** | 1.60 (1.38-1.86) | 1.56 (1.36-1.80) | 1.58 (1.34-1.87) | 1.52 (1.32-1.74) | 1.53 (1.34-1.76) |
| **Sex** |  |  |  |  |  |
| Female | Ref | Ref | Ref | Ref | Ref |
| Male | 1.24 (0.92-1.67) | 1.26 (0.94-1.67) | 1.17 (0.83-1.64) | 1.3 (0.98-1.73) | 1.3 (0.97-1.72) |
| **Race/ethnicity** |  |  |  |  |  |
| Non-Hispanic white | Ref | Ref | Ref | Ref | Ref |
| Hispanic | 1.39 (0.85-2.27) | 1.29 (0.82-2.02) | 1.29 (0.75-2.21) | 1.29 (0.82-2.02) | 1.25 (0.8-1.96) |
| Non-Hispanic Black | 1.22 (0.85-1.76) | 1.22 (0.86-1.74) | 1.18 (0.77-1.80) | 1.2 (0.85-1.71) | 1.21 (0.85-1.72) |
| Other | 1.00 (0.59-1.69) | 1.13 (0.69-1.87) | 1.08 (0.58-2.02) | 1.06 (0.64-1.76) | 1.08 (0.66-1.78) |
| **Region of patient residence** |  |  |  |  |  |
| US-Northeast | Ref | Ref | Ref | Ref | Ref |
| US-Midwest | 0.65 (0.44-0.95) | 0.65 (0.46-0.93) | 0.64 (0.42-0.97) | 0.68 (0.48-0.96) | 0.65 (0.46-0.93) |
| US-South | 0.71 (0.43-1.15) | 0.72 (0.45-1.15) | 0.74 (0.41-1.33) | 0.75 (0.47-1.2) | 0.74 (0.47-1.18) |
| US-West | 0.88 (0.51-1.53) | 0.94 (0.6-1.49) | 1.02 (0.58-1.79) | 0.94 (0.59-1.49) | 0.89 (0.56-1.41) |
| **Smoking status** |  |  |  |  |  |
| Never smoker | Ref | Ref | Ref | Ref | Ref |
| Current or former smoker | 1.21 (0.89-1.66) | 1.23 (0.91-1.66) | 1.2 (0.84-1.71) | 1.22 (0.9-1.64) | 1.19 (0.89-1.61) |
| **Obesity** |  |  |  |  |  |
| Not obese | Ref | Ref | Ref | Ref | Ref |
| Obese | 1.31 (0.95-1.81) | 1.23 (0.9-1.68) | 1.39 (0.95-2.02) | 1.25 (0.91-1.71) | 1.23 (0.9-1.69) |
| **Diabetes mellitus** |  |  |  |  |  |
| Not present | Ref | Ref | Ref | Ref | Ref |
| Present | 0.99 (0.73-1.35) | 1.04 (0.77-1.4) | 1.11 (0.78-1.59) | 1.05 (0.78-1.42) | 1.07 (0.79-1.44) |
| **Pulmonary comorbidities** |  |  |  |  |  |
| Not present | Ref | Ref | Ref | Ref | Ref |
| Present | 0.95 (0.68-1.34) | 0.94 (0.68-1.31) | 0.88 (0.59-1.31) | 0.97 (0.7-1.34) | 0.94 (0.68-1.31) |
| **Cardiovascular comorbidities** |  |  |  |  |  |
| Not present | Ref | Ref | Ref | Ref | Ref |
| Present | 1.09 (0.79-1.51) | 1.05 (0.77-1.42) | 1.08 (0.75-1.57) | 1.03 (0.76-1.4) | 1.03 (0.76-1.39) |
| **Renal comorbidities** |  |  |  |  |  |
| Not present | Ref | Ref | Ref | Ref | Ref |
| Present | 1.18 (0.85-1.65) | 1.19 (0.86-1.64) | 1.18 (0.81-1.72) | 1.15 (0.83-1.59) | 1.2 (0.87-1.66) |
| **Hypertension** |  |  |  |  |  |
| Not present | Ref | Ref | Ref | Ref | Ref |
| Present | 1.17 (0.83-1.65) | 1.16 (0.84-1.61) | 1.08 (0.73-1.59) | 1.15 (0.83-1.59) | 1.17 (0.84-1.61) |
| **ECOG performance status** |  |  |  |  |  |
| 0 | Ref | Ref | Ref | Ref | Ref |
| 1 | 1.48 (0.92-2.38) | 1.57 (1-2.46) | 1.57 (0.88-2.82) | 1.61 (1.02-2.53) | 1.61 (1.02-2.53) |
| 2+ | 3.99 (2.48-6.42) | 4.2 (2.67-6.62) | 4.82 (2.68-8.66) | 4.05 (2.56-6.39) | 4.07 (2.57-6.43) |
| Unknown | 2.09 (1.29-3.38) | 2.06 (1.3-3.26) | 2.5 (1.38-4.54) | 2.14 (1.36-3.38) | 2.09 (1.32-3.31) |
| **Cancer status** |  |  |  |  |  |
| Remission/NED | Ref | Ref | Ref | Ref | Ref |
| Active, progressing | 2.55 (1.60-4.06) | 2.69 (1.75-4.13) | 3.06 (1.86-5.05) | 2.72 (1.77-4.17) | 2.63 (1.71-4.03) |
| Active, stable or responding | 1.43 (0.99-2.06) | 1.45 (1.02-2.06) | 1.75 (1.15-2.66) | 1.47 (1.04-2.08) | 1.48 (1.04-2.09) |
| Unknown | 1.43 (0.90-2.28) | 1.64 (1.05-2.57) | 1.87 (1.08-3.25) | 1.53 (0.98-2.41) | 1.54 (0.98-2.42) |
| **Baseline COVID-19 severity** |  |  |  |  |  |
| Mild | Ref | Ref | Ref | Ref | Ref |
| Moderate | 2.11 (1.03-4.32) | 5.04 (3.12-8.13) | 4.13 (2.54-6.72) | 5.05 (3.14-8.12) | 5.11 (3.17-8.24) |
| Severe | 7.78 (3.63-16.68) | 17.38 (10.32-29.26) | N/A | 18.79 (11.18-31.58) | 18.25 (10.85-30.7) |
| **Aspirin/APA/Anticoagulation** |  |  |  |  |  |
| Absent | Ref | Ref | Ref | Ref | Ref |
| Present | 0.67 (0.43-1.02) | 0.84 (0.58-1.22) | 1.15 (0.73-1.8) | 0.89 (0.61-1.3) | 0.85 (0.58-1.23) |

aUnmatched controls

bRisk per decade

**Supplementary Table S10: Data elements in the CCC19 data collection form.** These variables are current as of June 29th, 2020 and do not include free text response elements. Note that the survey contains extensive branching logic; not every patient will have every one of these elements completed. ABNL: abnormal (outside normal reference range); ATC: Anatomical Therapeutic Classification; HI: above normal reference range; LO: below normal reference range; N: No; NA: not applicable; NAACCR: North American Association of Central Cancer Registries; NCIT: National Cancer Institute Thesaurus; OMOP: Observational Medical Outcomes Partnership Data Model; PHIN VADS: Public Health Information Network Vocabulary Access and Distribution System; SNOMED-CT: Systematized Nomenclature of Medicine, Clinical Terms; UNK: Unknown; WNL: within normal limits; Y: Yes

| Variable Name | Description | Value Set or Terminology | Category |
| --- | --- | --- | --- |
| aspirin_dose |  | SNOMED-CT | Baseline clinical details |
| bcg_vax | History of BCG vaccine? | Y/N/UNK | Baseline clinical details |
| bl_anticoag_reason | Why anticoag at baseline? | SNOMED-CT | Baseline clinical details |
| bl_anticoag_type | Anticoag at baseline? | ATC | Baseline clinical details |
| blood_type | ABO blood type | Direct coding + UNK | Baseline clinical details |
| blood_type_rh | Rh blood type | Direct coding + UNK | Baseline clinical details |
| bmi |  | Numeric, kg/m2 | Baseline clinical details |
| comorbid_no | number of comorbidities | Integer + UNK | Baseline clinical details |
| concomitant_meds |  | ATC | Baseline clinical details |
| ecog_status |  | Direct coding + UNK | Baseline clinical details |
| gcsf | G-CSF within 2 weeks of diagnosis? | Y/N/UNK | Baseline clinical details |
| height |  | Numeric, units not specified | Baseline clinical details |
| influenza_vax | Seasonal flu vaccine? | Y/N/UNK | Baseline clinical details |
| o2_requirement |  | Y/N/UNK | Baseline clinical details |
| recent_surgery |  | Y/N/UNK | Baseline clinical details |
| significant_comorbidities |  | SNOMED-CT | Baseline clinical details |
| smoking_product |  | SNOMED-CT | Baseline clinical details |
| smoking_status |  | Custom | Baseline clinical details |
| steroid_specific_2 | Steroid dosing | Custom | Baseline clinical details |
| surgery_timing |  | Custom | Baseline clinical details |
| weight |  | Numeric, units not specified | Baseline clinical details |
| adt | Has patient had ADT? | Y/N/UNK | Cancer details |
| bcg_intraves_ever |  | Y/N/UNK | Cancer details |
| cancer_status |  | Custom | Cancer details |
| cancer_timing |  | Custom | Cancer details |
| cancer_type |  | NCIT | Cancer details |
| cancer_type_2 | 2nd maligancy type (if applicable) | NCIT | Cancer details |
| clinical_trial |  | Y/N/UNK | Cancer details |
| gleason | Gleason score | NAACCR | Cancer details |
| gleason_source |  | NAACCR | Cancer details |
| hospice |  | Y/N/UNK | Cancer details |
| hx_treatment | Timing of cancer treatment | Custom | Cancer details |
| intravesicular_bcg |  | Y/N/UNK | Cancer details |
| irae_past |  | Y/N/UNK | Cancer details |
| mets_sites | Sites of metastatic cancer | NAACCR | Cancer details |
| mets_yn | Metastatic at COVID-19 diagnosis? | Y/N/UNK | Cancer details |
| multiple_ca |  | Y/N/UNK | Cancer details |
| on_treatment | On recent cancer treatment | Y/N/UNK | Cancer details |
| orchiectomy | Has patient had bilateral orchiectomy? | Y/N/UNK | Cancer details |
| other_irae |  | Y/N/UNK | Cancer details |
| pneumonitis | Concurrent irAE pneumonitis? | Custom | Cancer details |
| prior_tx | prior lung-toxic therapy? | HemOnc | Cancer details |
| prostate_tx | Prostate cancer therapy | RxNorm | Cancer details |
| radiotherapy |  | Y/N/UNK | Cancer details |
| recent_treatment | Most recent anti-cancer treatment | Custom | Cancer details |
| stage |  | NAACCR | Cancer details |
| transplant_cellular_therapy | | Custom | Cancer details |
| transplant_cellular_timing | | Custom | Cancer details |
| treatment_context |  | HemOnc | Cancer details |
| treatment_intent |  | Custom | Cancer details |
| treatment_modality |  | HemOnc | Cancer details |
| what_immunotherapy |  | HemOnc | Cancer details |
| berlin_2 | Berlin criteria if ARDS | Direct coding + UNK | COVID-19 details |
| berlin_yn | Berlin criteria collected? | Y/N/UNK | COVID-19 details |
| c19_anticoag_reason | Purpose of anticoagulation | Custom | COVID-19 details |
| c19_anticoag_type | Type of anticoagulant used | ATC | COVID-19 details |
| c19_aspirin_dose |  | SNOMED-CT | COVID-19 details |
| c19_bleeding |  | SNOMED-CT-modified | COVID-19 details |
| c19_complications_card |  | SNOMED-CT | COVID-19 details |
| c19_complications_gi |  | SNOMED-CT | COVID-19 details |
| c19_complications_other |  | SNOMED-CT | COVID-19 details |
| c19_complications_pulm |  | SNOMED-CT | COVID-19 details |
| c19_complications_systemic | | SNOMED-CT | COVID-19 details |
| c19_workup_why | Reason for COVID-19 workup | Custom | COVID-19 details |
| c19_workup_why_2 | Reason for COVID-19 workup | Custom | COVID-19 details |
| coinfection |  | SNOMED-CT | COVID-19 details |
| coinfection_yn |  | Y/N/UNK | COVID-19 details |
| complications_severity |  | Custom | COVID-19 details |
| covid_19_diagnosis |  | Custom | COVID-19 details |
| covid_19_dx_interval | Time since COVID-19 diagnosis | Custom | COVID-19 details |
| covid_19_treatment |  | ATC/HemOnc/OMOP/RxNorm | COVID-19 details |
| covid_19_treatment_trial |  | Y/N/UNK | COVID-19 details |
| covid_19_trial_tx | Treatment(s) on trial | ATC/HemOnc/OMOP/RxNorm | COVID-19 details |
| covid_19_tx_interleukin | Anti-interleukin treatments | ATC | COVID-19 details |
| covid_19_tx_tnf | TNF-alpha treatments | ATC | COVID-19 details |
| current_status | ADT status | Custom | COVID-19 details |
| current_status_clinical | Clinical status | Custom | COVID-19 details |
| current_status_retro | Clinical status | Custom | COVID-19 details |
| current_status_v2 | Clinical status | Custom | COVID-19 details |
| days_to_death |  | Integer | COVID-19 details |
| dx_year | year of COVID-19 diagnosis | Integer | COVID-19 details |
| hosp_los | floor LOS | Integer, days | COVID-19 details |
| hosp_los_2 | floor LOS if transferred to ICU | Integer, days | COVID-19 details |
| hosp_status |  | Custom | COVID-19 details |
| icu_los |  | Integer, days | COVID-19 details |
| labs | Timepoint when labs were drawn | Custom | COVID-19 details |
| mortality |  | Y/N/NA/UNK | COVID-19 details |
| neg_test | was initial COVID-19 test negative | Y/N/UNK | COVID-19 details |
| o2_policy | Policy on intubation? | Y/N/UNK | COVID-19 details |
| o2_requirement_c19 |  | Y/N/UNK | COVID-19 details |
| prbc | PRBC transfusions given? | Y/N/UNK | COVID-19 details |
| resp_failure_tx |  | Custom | COVID-19 details |
| sepsis_pressors | Pressors for sepsis or HoTN? | Y/N/UNK | COVID-19 details |
| severity_of_covid_19 |  | Custom | COVID-19 details |
| steroid_specific | Steroid dosing | Custom | COVID-19 details |
| symptoms |  | SNOMED-CT | COVID-19 details |
| symptoms_none_why | Why tested? | Y/N/UNK | COVID-19 details |
| timing_of_report | Real-time or retrospective? | Custom | COVID-19 details |
| worst_complications_severity | Retrospective worst complications | Custom | COVID-19 details |
| worst_status_clinical | Retrospective worst clinical status | Custom | COVID-19 details |
| age | age in decades | Custom | Demographics |
| age_exact |  | Integer | Demographics |
| city | city of healthcare delivery | N/A (free text) | Demographics |
| country_of_patient_residen | | Custom | Demographics |
| ethnicity |  | PHIN VADS | Demographics |
| facility | facility of healthcare delivery | N/A (free text) | Demographics |
| gender |  | Custom | Demographics |
| hcw | health care worker | Y/N/UNK | Demographics |
| insurance | Insurance type | Custom | Demographics |
| race |  | PHIN VADS | Demographics |
| state_of_patient_residence | | Direct coding (US abbreviations) | Demographics |
| berlin_fu | Berlin criteria if ARDS | Direct coding + UNK | Follow-up details |
| berlin_yn_fu | Berlin criteria collected? | Y/N/UNK | Follow-up details |
| c19_addl_treatment |  | Y/N/UNK | Follow-up details |
| c19_anticoag_reason_fu | Purpose of anticoagulation | Custom | Follow-up details |
| c19_anticoag_type_fu | Type of anticoagulant used | ATC | Follow-up details |
| c19_aspirin_dose_fu |  | SNOMED-CT | Follow-up details |
| c19_bleeding_fu |  | SNOMED-CT-modified | Follow-up details |
| c19_complications_card_fu | | SNOMED-CT | Follow-up details |
| c19_complications_gi_fu |  | SNOMED-CT | Follow-up details |
| c19_complications_other_fu | | SNOMED-CT | Follow-up details |
| c19_complications_pulm_fu | | SNOMED-CT | Follow-up details |
| c19_complications_systemic_fu | | SNOMED-CT | Follow-up details |
| cancer_status_fu |  | Custom | Follow-up details |
| cancer_tx_fu | Was treatment modified d/t COVID-19? | Y/N/UNK | Follow-up details |
| complications_severity_fu | | Custom | Follow-up details |
| covid_19_status_fu |  | Custom | Follow-up details |
| covid_19_treatment_fu |  | ATC/HemOnc/OMOP/RxNorm | Follow-up details |
| covid_19_treatment_trial_fu | | Y/N/UNK | Follow-up details |
| covid_19_trial_tx_fu |  | ATC/HemOnc/OMOP/RxNorm | Follow-up details |
| covid_19_tx_interleukin_fu | | ATC | Follow-up details |
| covid_19_tx_tnf_fu | x+[@[Variable / Field Name]] | ATC | Follow-up details |
| current_status_clinical_fu | | Custom | Follow-up details |
| current_status_fu |  | Custom | Follow-up details |
| days_to_death_fu |  | Integer | Follow-up details |
| fu_weeks |  | Numeric, weeks | Follow-up details |
| hosp_los_fu |  | Integer, days | Follow-up details |
| hosp_los_fu_2 |  | Integer, days | Follow-up details |
| hosp_status_fu |  | Y/N/UNK | Follow-up details |
| hospice_fu |  | Y/N/UNK | Follow-up details |
| hotn_pressors_fu |  | Y/N/UNK | Follow-up details |
| icu_los_fu |  | Integer, days | Follow-up details |
| o2_requirement_fu |  | Y/N/UNK | Follow-up details |
| resp_failure_tx_fu |  | Custom | Follow-up details |
| steroid_specific_fu | Steroid dosing | Custom | Follow-up details |
| timing_of_report_weeks |  | Numeric, weeks | Follow-up details |
| who_ordinal_scale | WHO Ordinal Scale for Clinical Improvement | Custom | Follow-up details |
| worst_complications_severity_fu | | Custom | Follow-up details |
| aec | absolute eosinophil count | Numeric, per uL | Laboratory values |
| aec_range |  | LO/WNL/HI/UNK | Laboratory values |
| alc | absolute lymphocyte count | Numeric, per uL | Laboratory values |
| alc_range |  | LO/WNL/HI/UNK | Laboratory values |
| alt |  | NL/ABNL/UNK | Laboratory values |
| alt_numeric |  | Numeric, units/L | Laboratory values |
| anc | absolute neutrophil count | Numeric, per uL | Laboratory values |
| anc_range |  | LO/WNL/HI/UNK | Laboratory values |
| aptt | activated partial thromboplastin time | NL/ABNL/UNK | Laboratory values |
| aptt_numeric |  | Numeric, s | Laboratory values |
| ast |  | NL/ABNL/UNK | Laboratory values |
| ast_numeric |  | Numeric, units/L | Laboratory values |
| bnp |  | NL/ABNL/UNK | Laboratory values |
| bnp_numeric |  | Numeric, pg/mL | Laboratory values |
| creat | creatinine | NL/ABNL/UNK | Laboratory values |
| creat_numeric |  | Numeric, mg/dL | Laboratory values |
| crp | C-reactive protein | NL/ABNL/UNK | Laboratory values |
| crp_numeric |  | Numeric, specify units | Laboratory values |
| ddimer |  | NL/ABNL/UNK | Laboratory values |
| ddimer_numeric |  | Numeric, specify units | Laboratory values |
| fibrinogen |  | NL/ABNL/UNK | Laboratory values |
| fibrinogen_numeric |  | Numeric, mg/dL | Laboratory values |
| hgb | hemoglobin | Numeric, g/dL | Laboratory values |
| hgb_range |  | LO/WNL/HI/UNK | Laboratory values |
| hiv_cd4 | CD4+ T-cell count | Numeric | Laboratory values |
| hiv_vl | HIV viral load | Numeric | Laboratory values |
| hs_trop | high-sensitivity troponin | NL/ABNL/UNK | Laboratory values |
| hs_trop_numeric |  | Numeric, pg/mL | Laboratory values |
| il6 |  | NL/ABNL/UNK | Laboratory values |
| il6_numeric |  | Numeric, pg/mL | Laboratory values |
| ldh | lactate dehydrogenase | NL/ABNL/UNK | Laboratory values |
| ldh_numeric |  | Numeric, specify units | Laboratory values |
| other_lab |  | NL/ABNL/UNK | Laboratory values |
| plt | platelets | Numeric, per 10^3/uL | Laboratory values |
| plt_range |  | LO/WNL/HI/UNK | Laboratory values |
| pt | prothrombin time | NL/ABNL/UNK | Laboratory values |
| pt_numeric |  | Numeric, s | Laboratory values |
| tbili | total bilirubin | NL/ABNL/UNK | Laboratory values |
| tbili_numeric |  | N/A (free text) | Laboratory values |
| tni | troponin I | NL/ABNL/UNK | Laboratory values |
| tni_numeric |  | Numeric, ng/mL | Laboratory values |
| wbc_numeric |  | Numeric, per 10^9/L | Laboratory values |
| wbc_range |  | LO/WNL/HI/UNK | Laboratory values |
| ccc19 |  | Y/N | Metadata |
| ccc19_institution |  | Integer | Metadata |
| patient_id | CCC19 institution non-PHI ID | Integer | Metadata |
| record_id |  | Integer | Metadata |
| practice_setting |  | Custom | Respondent details |
| role | primary managing hem/onc? | Y/N | Respondent details |
| role_2 | expand if role = N | Custom | Respondent details |

**Supplementary Table S11: Derived variables.** In order to conduct the analysis, transformations were necessary to create derived variables. Raw variable names are shown in italics and are described in Supplementary Table S1. Rules are applied in order.

| Derived variable name | Description |
| --- | --- |
| Age | 1. If *age_exact* exists, keep 2. If *age_exact* does not exist and *age* equals “Older than 90” 🡪 90 3. If *age_exact* does not exist and *age* equals “18-29”, “30-39”, “40-49”, “50-59”, “60-69”, “70-79”, or “80-89” 🡪 take the midpoint of the age interval as the age |
| Sex | 1. If *gender* equals female, keep 2. If *gender* equals male, keep 3. If *gender* equals other or prefer not to say 🡪 missing |
| Race/ethnicity | 1. If *race* has white checked AND *ethnicity* equals NOT Hispanic or Latino OR unknown/not reported 🡪 White non-Hispanic 2. If *race* has black or African American checked AND *ethnicity* equals NOT Hispanic or Latino OR unknown/not reported 🡪 Black non-Hispanic 3. Any other *race* choice is assigned 🡪 Other/Unknown 4. If *ethnicity* equals Hispanic or Latino 🡪 Hispanic |
| Region of patient residence | 1. If *state_of_patient_residence* equals ME, NH, VT, MA, RI, CT, PA, NY, or NJ 🡪 US-Northeast 2. If *state_of_patient_residence* equals WI, MI, IL, IN, OH, MO, ND, SD, NE, KS, MN, or IA 🡪 US-Midwest 3. If *state_of_patient_residence* equals DE, MD, DC, VA, WV, NC, SC, GA, FL, TN, KY, MS, AL, OK, TX, LA, or AR 🡪 US-South 4. If *state_of_patient_residence* equals ID, MT, WY, NV, UT, CO, AZ, NM, AK, WA, OR, CA, or HI 🡪 US-West |
| Smoking status | 1. If *smoking_status* equals never smoker, keep 2. If *smoking_status* equals current smoker or “former smoker, NOS” OR “former smoker, quit less than 1 year ago” OR “former smoker, quit between 1 and 5 years ago” OR “former smoker, quit between 6 and 10 years ago” OR “former smoker, quit more than 10 years ago” 🡪 current or former smoker 3. If *smoking_status* equals unknown 🡪 missing |
| Obesity | 1. If *significant_comorbidities* has obesity OR morbid obesity checked 🡪 Obese 2. If *significant_comorbidities* does not have either obesity or morbid obesity checked AND has at least one other choice checked 🡪 Not obese 3. If *bmi* has a value that is greater than or equal to 30 kg/m2 🡪 Obese 4. If *height* and *weight* have values and *bmi* is missing, calculate BMI. If calculated BMI has a value that is greater than or equal to 30 kg/m2 🡪 Obese 5. If *significant_comorbidities* does not have any choices checked and *height*, *weight*, and *bmi* are missing 🡪 Missing |
| Diabetes mellitus | 1. If *significant_comorbidities* has diabetes mellitus checked 🡪 Present 2. If *significant_comorbidities* does not have diabetes mellitus checked 🡪 Absent 3. If *significant_comorbidities* does not have any choices except for “Unknown” checked 🡪 Unknown 4. If *significant_comorbidities* does not have any choices checked 🡪 Missing |
| Hypertension | 1. If *significant_comorbidities* has hypertension checked 🡪 Present 2. If *significant_comorbidities* does not have hypertension checked 🡪 Absent 3. If *significant_comorbidities* does not have any choices except for “Unknown” checked 🡪 Unknown 4. If *significant_comorbidities* does not have any choices checked 🡪 Missing |
| Pulmonary comorbidities | 1. If *significant_comorbidities* has ANY of the following checked: “13645005”, “19829001”, “195967001”, “84004001”, or “427046006” 🡪 Present 2. If *significant_comorbidities* does not have any of #1 checked 🡪 Absent 3. If *significant_comorbidities* does not have any choices except for “Unknown” checked 🡪 Unknown 4. If *significant_comorbidities* does not have any choices checked 🡪 Missing |
| Cardiovascular comorbidities | 1. If *significant_comorbidities* has ANY of the following checked: “53741008”, “56265001”, “42343007”, “698247007”, “49436004”, “400047006”, “275526006” 🡪 Present 2. If *significant_comorbidities* does not have any of #1 checked 🡪 Absent 3. If *significant_comorbidities* does not have any choices except for “Unknown” checked 🡪 Unknown 4. If *significant_comorbidities* does not have any choices checked 🡪 Missing |
| Renal comorbidities | 1. If *significant_comorbidities* has ANY of the following checked: “90708001”, “723190009”, “46177005”, “236435004” 🡪 Present 2. If *significant_comorbidities* does not have any of #1 checked 🡪 Absent 3. If *significant_comorbidities* does not have any choices except for “Unknown” checked 🡪 Unknown 4. If *significant_comorbidities* does not have any choices checked 🡪 Missing |
| Cancer status | 1. If *cancer_status* equals “remission/NED”, keep 2. If *cancer_status* equals “active disease, responding to treatment” OR “active disease, stable” 🡪 present, stable or responding to treatment 3. If *cancer_status* equals “active disease, progressing”, keep 4. If *cancer_status* equals “unknown”, keep |
| ECOG performance status | 1. If *ecog_status* equals 0, keep 2. If *ecog_status* equals 1, keep 3. If *ecog_status* equals 2, 3, or 4 🡪 2+ 4. If *ecog_status* equals unknown, keep |
| Baseline severity of COVID-19 | 1. If *severity_of_covid_19_v2* equals 1 (Mild – no hospitalization required) 🡪 Mild 2. If *severity_of_covid_19_v2* equals 2 (Moderate – hospitalization indicated) 🡪 Moderate 3. If *severity_of_covid_19_v2* equals 3 (Severe – ICU admission indicated) 🡪 Severe |
| Anticoagulation, aspirin, or other anti-platelet agent exposure (ever/never) | 1. If *concomitant_meds* OR *covid_19_treatment* OR *covid_19_treatment_fu* have ANY of the following checked: “B01A”, “N02BA”, or “B01AC” 🡪 Yes 2. If *concomitant_meds* AND *covid_19_treatment* AND *covid_19_treatment_fu* have NONE of the following checked: “B01A”, “N02BA”, or “B01AC” 🡪 No 3. If *concomitant_meds* AND *covid_19_treatment* AND *covid_19_treatment_fu* do not have any choices except for “Unknown” checked 🡪 Unknown 4. If *concomitant_meds* AND *covid_19_treatment* AND *covid_19_treatment_fu* do not have any choices checked 🡪 Missing |
| Hydroxychloroquine for treatment of COVID-19 | 1. Assign all exposures as Missing 2. If *covid_19_treatment* OR *covid_19_treatment_fu* OR *covid_19_trial_tx* OR *covid_19_trial_tx_fu* have hydroxychloroquine checked 🡪 Yes 3. If *covid_19_treatment* AND *covid_19_treatment_fu* have hydroxychloroquine unchecked and exposure is Missing 🡪 No 4. If *covid_19_treatment* AND *covid_19_treatment_fu* do not have any choices except for “Unknown” checked and exposure is No or Missing 🡪 Unknown 5. If *covid_19_treatment* AND *covid_19_treatment_fu* do not have any choices checked and exposure is No 🡪 Missing |
| Azithromycin for treatment of COVID-19 | 1. Assign all exposures as Missing 2. If *covid_19_treatment* OR *covid_19_treatment_fu* OR *covid_19_trial_tx* OR *covid_19_trial_tx_fu* have azithromycin checked 🡪 Yes 3. If *covid_19_treatment* AND *covid_19_treatment_fu* have azithromycin unchecked and exposure is Missing 🡪 No 4. If *covid_19_treatment* AND *covid_19_treatment_fu* do not have any choices except for “Unknown” checked and exposure is No or Missing 🡪 Unknown 5. If *covid_19_treatment* AND *covid_19_treatment_fu* do not have any choices checked and exposure is No 🡪 Missing |
| Remdesivir for treatment of COVID-19 | 1. Assign all exposures as Missing 2. If *covid_19_treatment* OR *covid_19_treatment_fu* OR *covid_19_trial_tx* OR *covid_19_trial_tx_fu* have remdesivir checked 🡪 Yes 3. If *covid_19_treatment* AND *covid_19_treatment_fu* have remdesivir unchecked and exposure is Missing 🡪 No 4. If *covid_19_treatment* AND *covid_19_treatment_fu* do not have any choices except for “Unknown” checked and exposure is No or Missing 🡪 Unknown 5. If *covid_19_treatment* AND *covid_19_treatment_fu* do not have any choices checked and exposure is No 🡪 Missing |
| Tocilizumab for treatment of COVID-19 | 1. Assign all exposures as Missing 2. If *covid_19_treatment* OR *covid_19_treatment_fu* OR *covid_19_trial_tx* OR *covid_19_trial_tx_fu* have tocilizumab checked 🡪 Yes 3. If *covid_19_treatment* AND *covid_19_treatment_fu* have tocilizumab unchecked and exposure is Missing 🡪 No 4. If *covid_19_treatment* AND *covid_19_treatment_fu* do not have any choices except for “Unknown” checked and exposure is No or Missing 🡪 Unknown 5. If *covid_19_treatment* AND *covid_19_treatment_fu* do not have any choices checked and exposure is No 🡪 Missing |
| High-dose systemic corticosteroids for treatment of COVID-19 | 1. Assign all exposures as Missing 2. If *steroid_specific* OR *steroid_specific_fu* have 2 (More than 20 mg/day but less than 1 mg/kg/day) OR 3 (Equal to or greater than 1 mg/kg/day) checked 🡪 Yes 3. If *covid_19_treatment* OR *covid_19_treatment_fu* have systemic corticosteroids checked AND *steroid_specific* OR *steroid_specific_fu* have 1a (10 mg/day or below [low dose]) OR 1b (More than 10 mg/day up to 20 mg/day) checked AND exposure is Missing 🡪 No 4. If *covid_19_treatment* AND *covid_19_treatment_fu* have systemic corticosteroids unchecked AND exposure is Missing 🡪 No 5. If *covid_19_treatment* AND *covid_19_treatment_fu* do not have any choices except for “Unknown” checked AND exposure is No OR Missing 🡪 Unknown 6. If *covid_19_treatment* AND *covid_19_treatment_fu* do not have any choices checked and exposure is No 🡪 Missing |
| Other treatments for COVID-19 | 1. Assign all exposures as Missing 2. If *covid_19_treatment* OR *covid_19_treatment_fu* have any of the following checked: “RXCUI-2393”, “ATC-J05AE08”, “ATC-J05AR10”, “L04AA37”, “ATC-L04AC”, “ATC-L04AB”, or “B05AX03” 🡪 Yes 3. If *covid_19_treatment* AND *covid_19_treatment_fu* have all of the above unchecked and exposure is Missing 🡪 No 4. If *covid_19_trial_tx* OR *covid_19_trial_tx_fu* have anything checked other than hydroxychloroquine, azithromycin, remdesivir, tocilizumab, systemic corticosteroids, or unknown 🡪 Yes 5. If *covid_19_treatment* AND *covid_19_treatment_fu* do not have any choices except for “Unknown” checked and exposure is No or Missing 🡪 Unknown 6. If *covid_19_treatment* AND *covid_19_treatment_fu* do not have any choices checked and exposure is No 🡪 Missing |
| Death | 1. If *current_status_retro* equals “Died” or *current_status_v2* equals “Died” or *current_status* equals “None – patient is deceased” 🡪 Yes 2. If *current_status_retro* NOT equals “Died” AND *current_status_v2* NOT equals “Died” AND *current_status* NOT equals “None – patient is deceased” 🡪 No 3. If *covid_19_status_fu* equals “Died” or *current_status_fu* equals “None – patient is deceased” or *fu_reason* equals “Death” 🡪 Yes 4. If none of the above are met 🡪 Unknown |
| Death within 30 days | 1. If *Death (derived)* equals Yes and calculated time to death based on interval from diagnosis to timing of most recent report is less than or equal to 30 days 🡪 Yes 2. If *Death (derived)* equals Yes and *mortality* is set to 0 (patient was not alive 30 days after diagnosis) 🡪 Yes 3. If *Death (derived)* equals Yes and a follow-up form is present with *fu_weeks* equals “Approximately 30 days after COVID-19 diagnosis” AND the *fu_reason* equal to “Death” OR *covid_19_status_fu* equals “Died” OR *current_status_fu* equals “None – patient is deceased” 🡪 Yes 4. If *Death (derived)* equals Yes and a follow-up form is present with *fu_weeks* equals “All other time intervals” AND timing_of_report_weeks is less than or equal to four AND the *fu_reason* equal to “Death” OR *covid_19_status_fu* equals “Died” OR *current_status_fu* equals “None – patient is deceased” 🡪 Yes 5. If *Death (derived)* equals Yes and days to death is present and is less than or equal to 30 days 🡪 Yes 6. If *Death (derived)* equals Yes and days to death is present and is greater than 30 days 🡪 No |

# **Supplemental Figure S1: UpSet plot of treatment exposures in hospitalized patients.**

This includes n=1243 (57%) patients known to be hospitalized at some point during their COVID-19 illness.


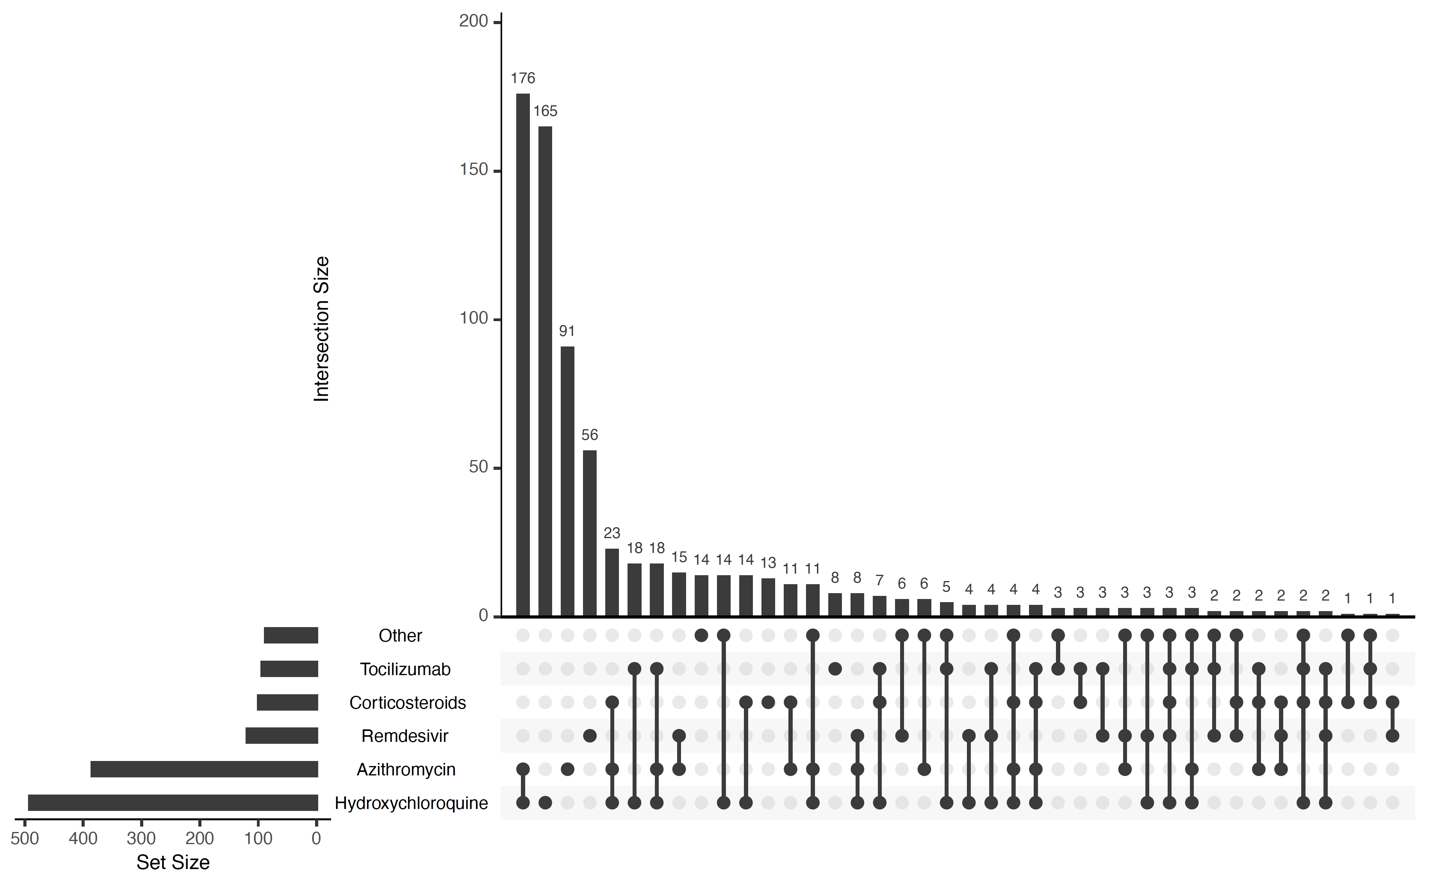


# **Supplemental Figure S2: UpSet plot of treatment exposures in never-hospitalized patients.**

This includes n=569 (26%) patients known not to be hospitalized during the course of their COVID-19 illness (up until the time of last reporting). It does not include n=24 (1%) patients with unknown hospitalization status, or n=350 (16%) patients with missing hospitalization status.


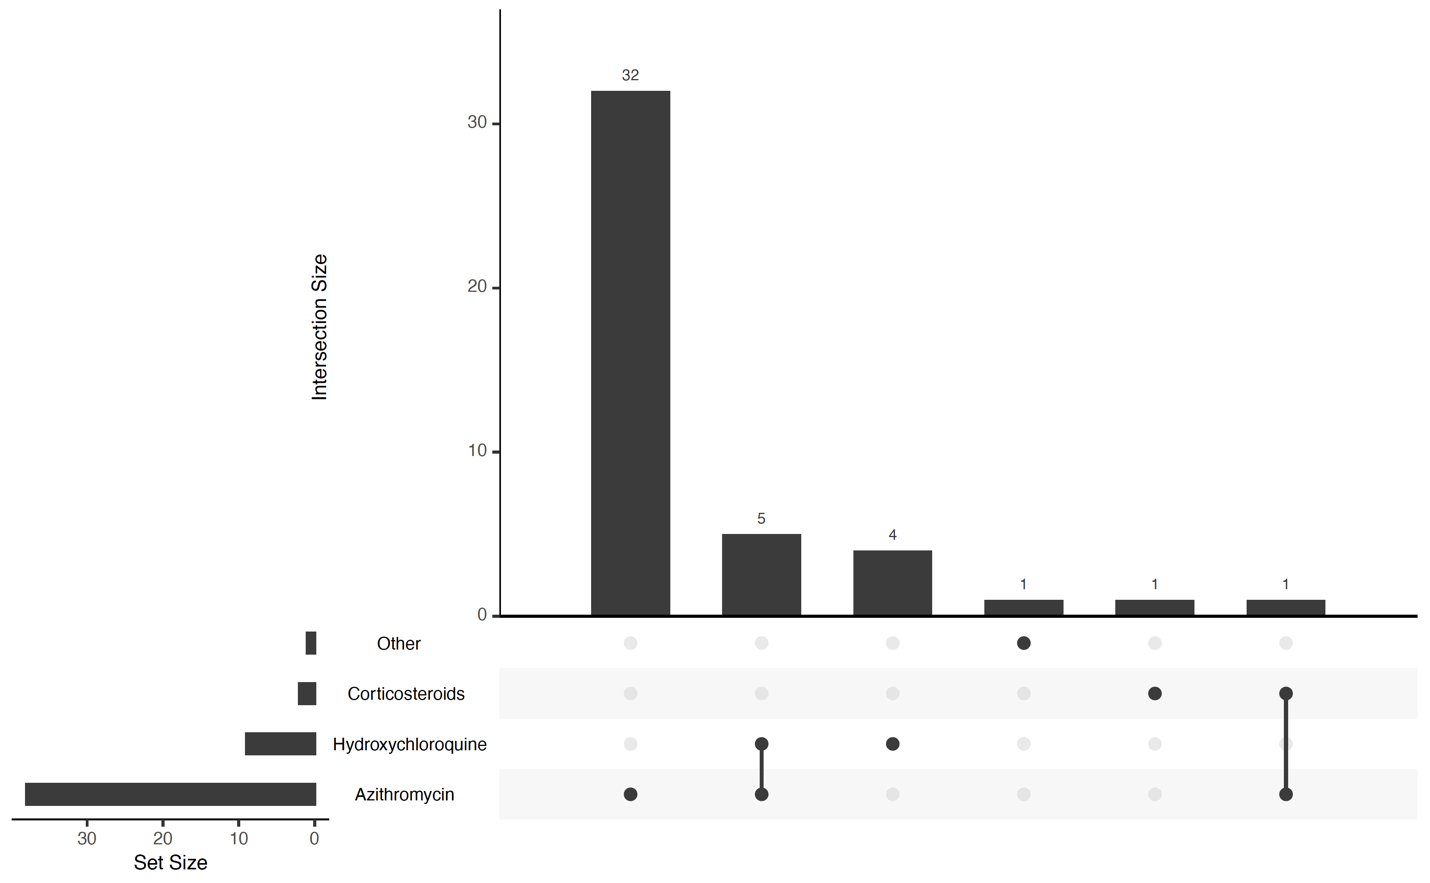


**Supplemental Figure S3: Propensity score matching results**. Distributions of propensity scores of HCQ alone, HCQ plus anything, Negative control, and Positive control before (left) and after (right) matching using the nearest-neighbor method with a 1:2 ratio and 0.3 standard deviation.


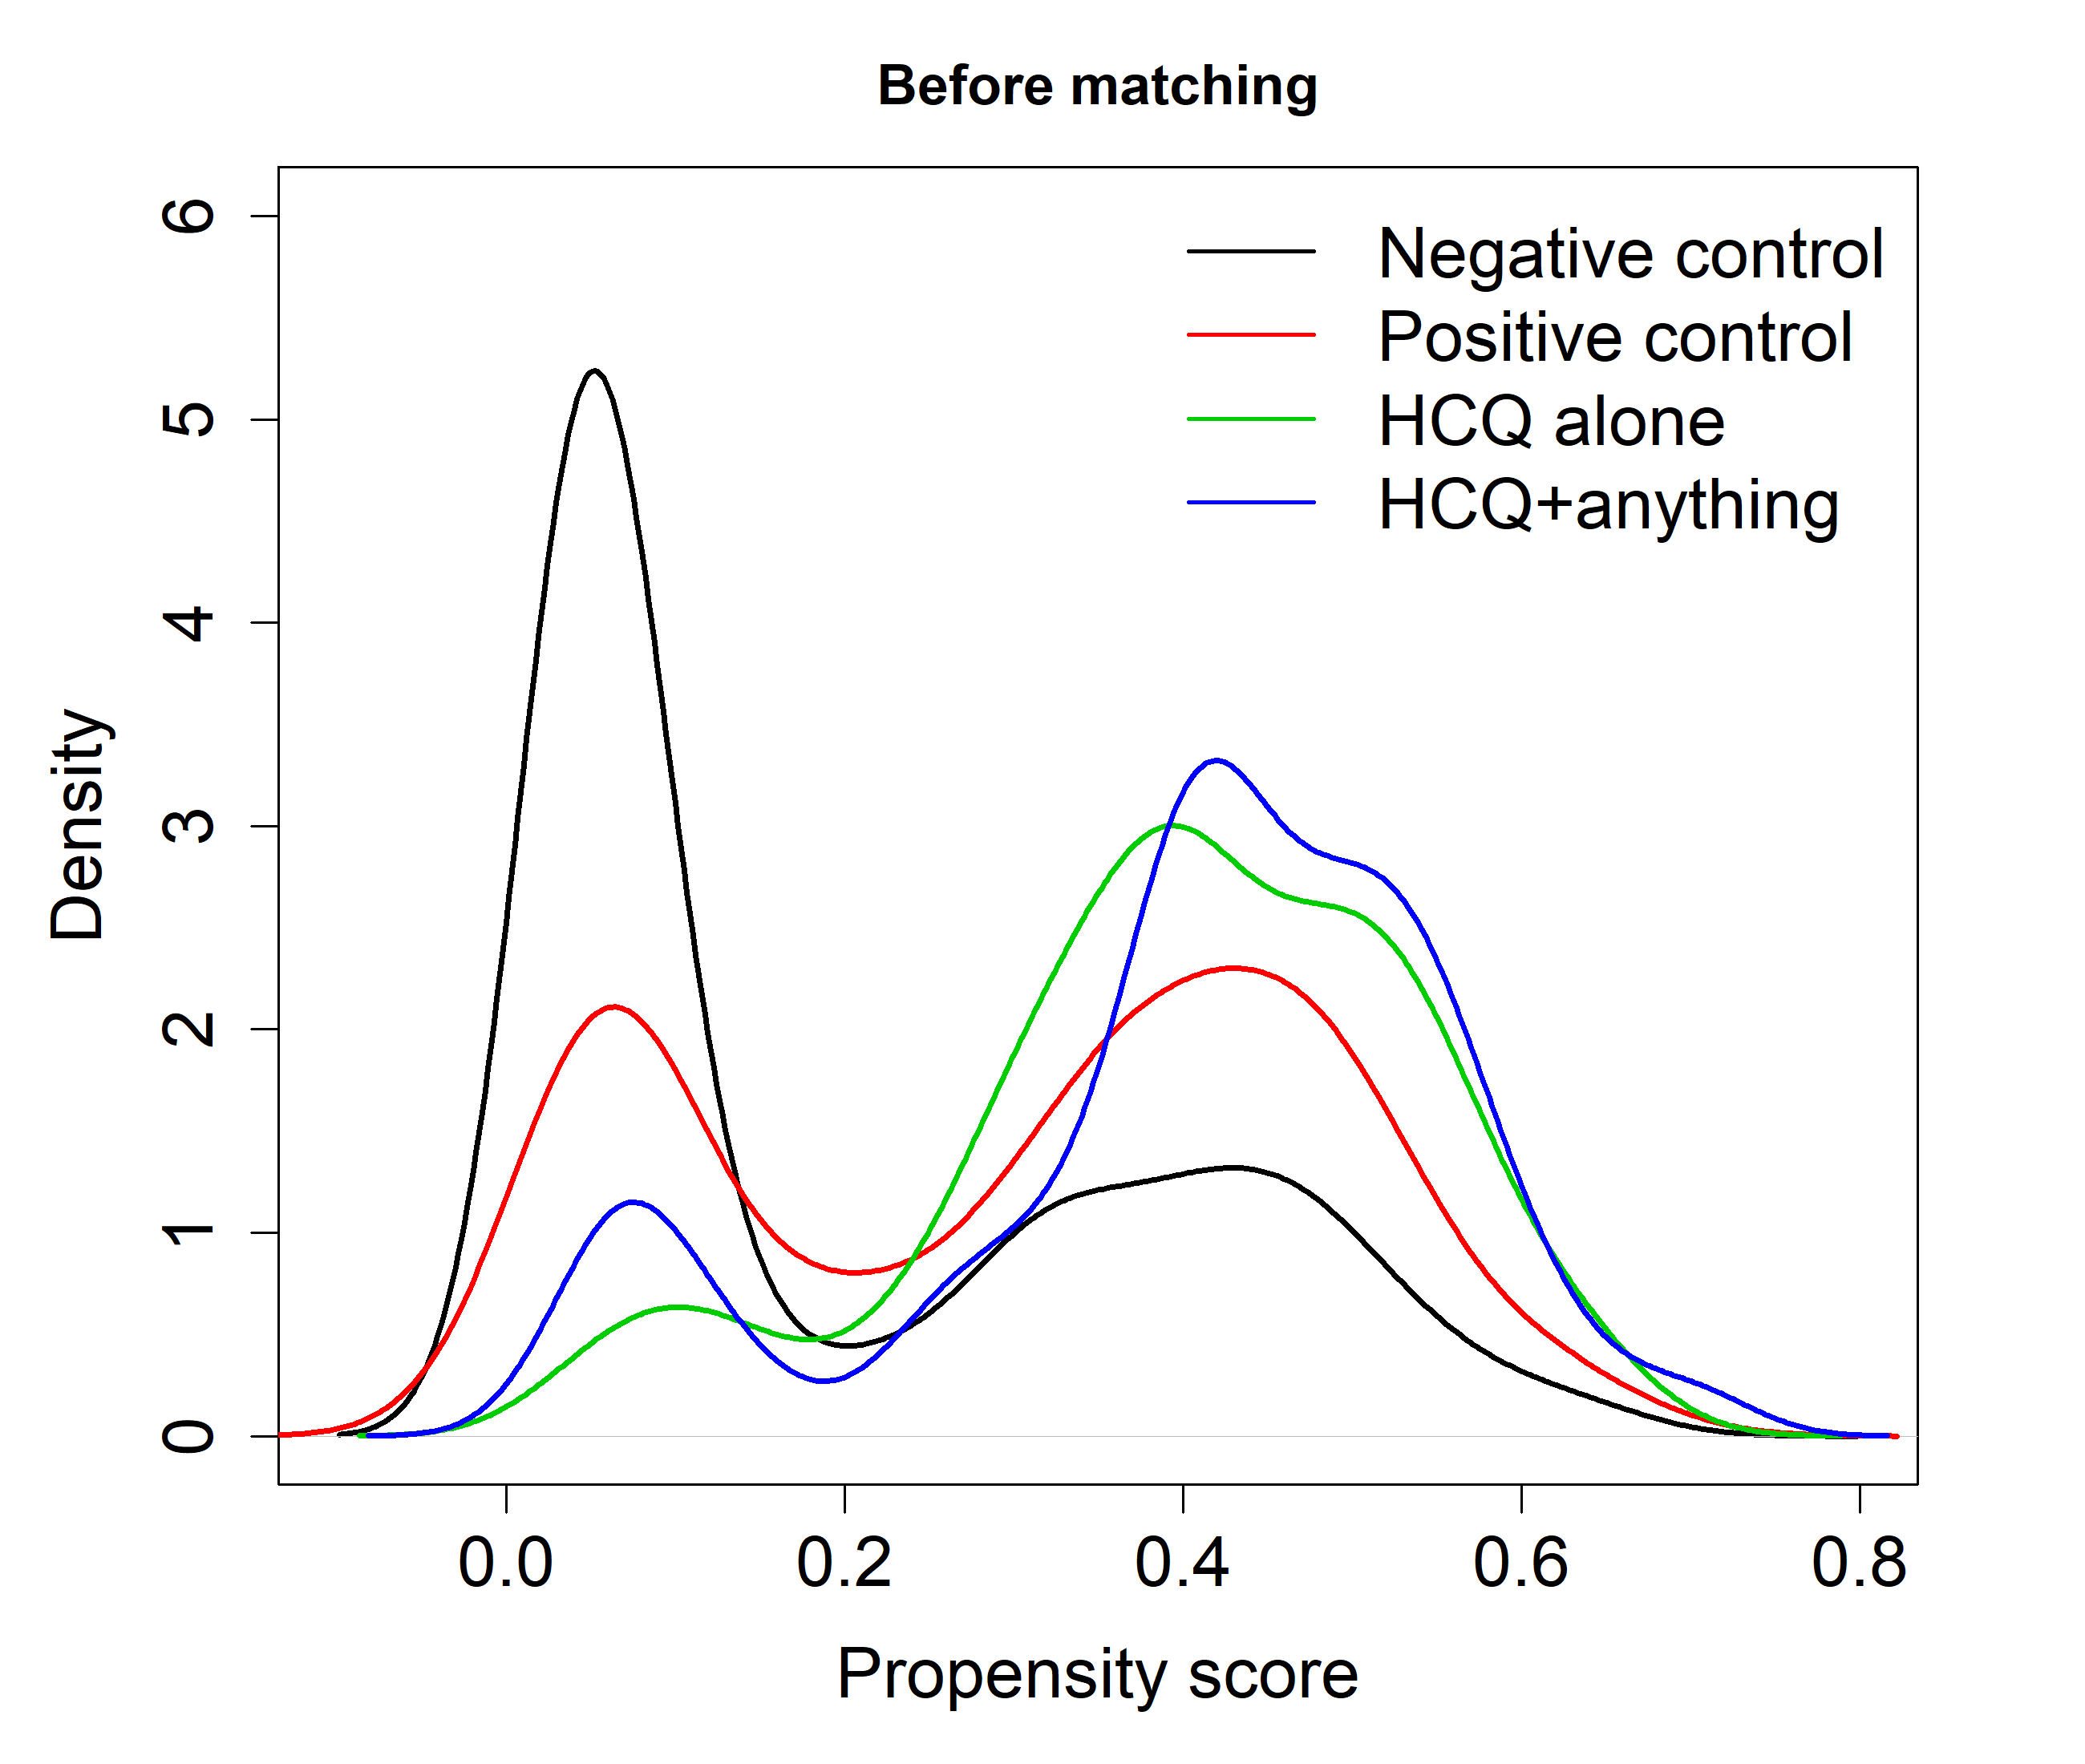

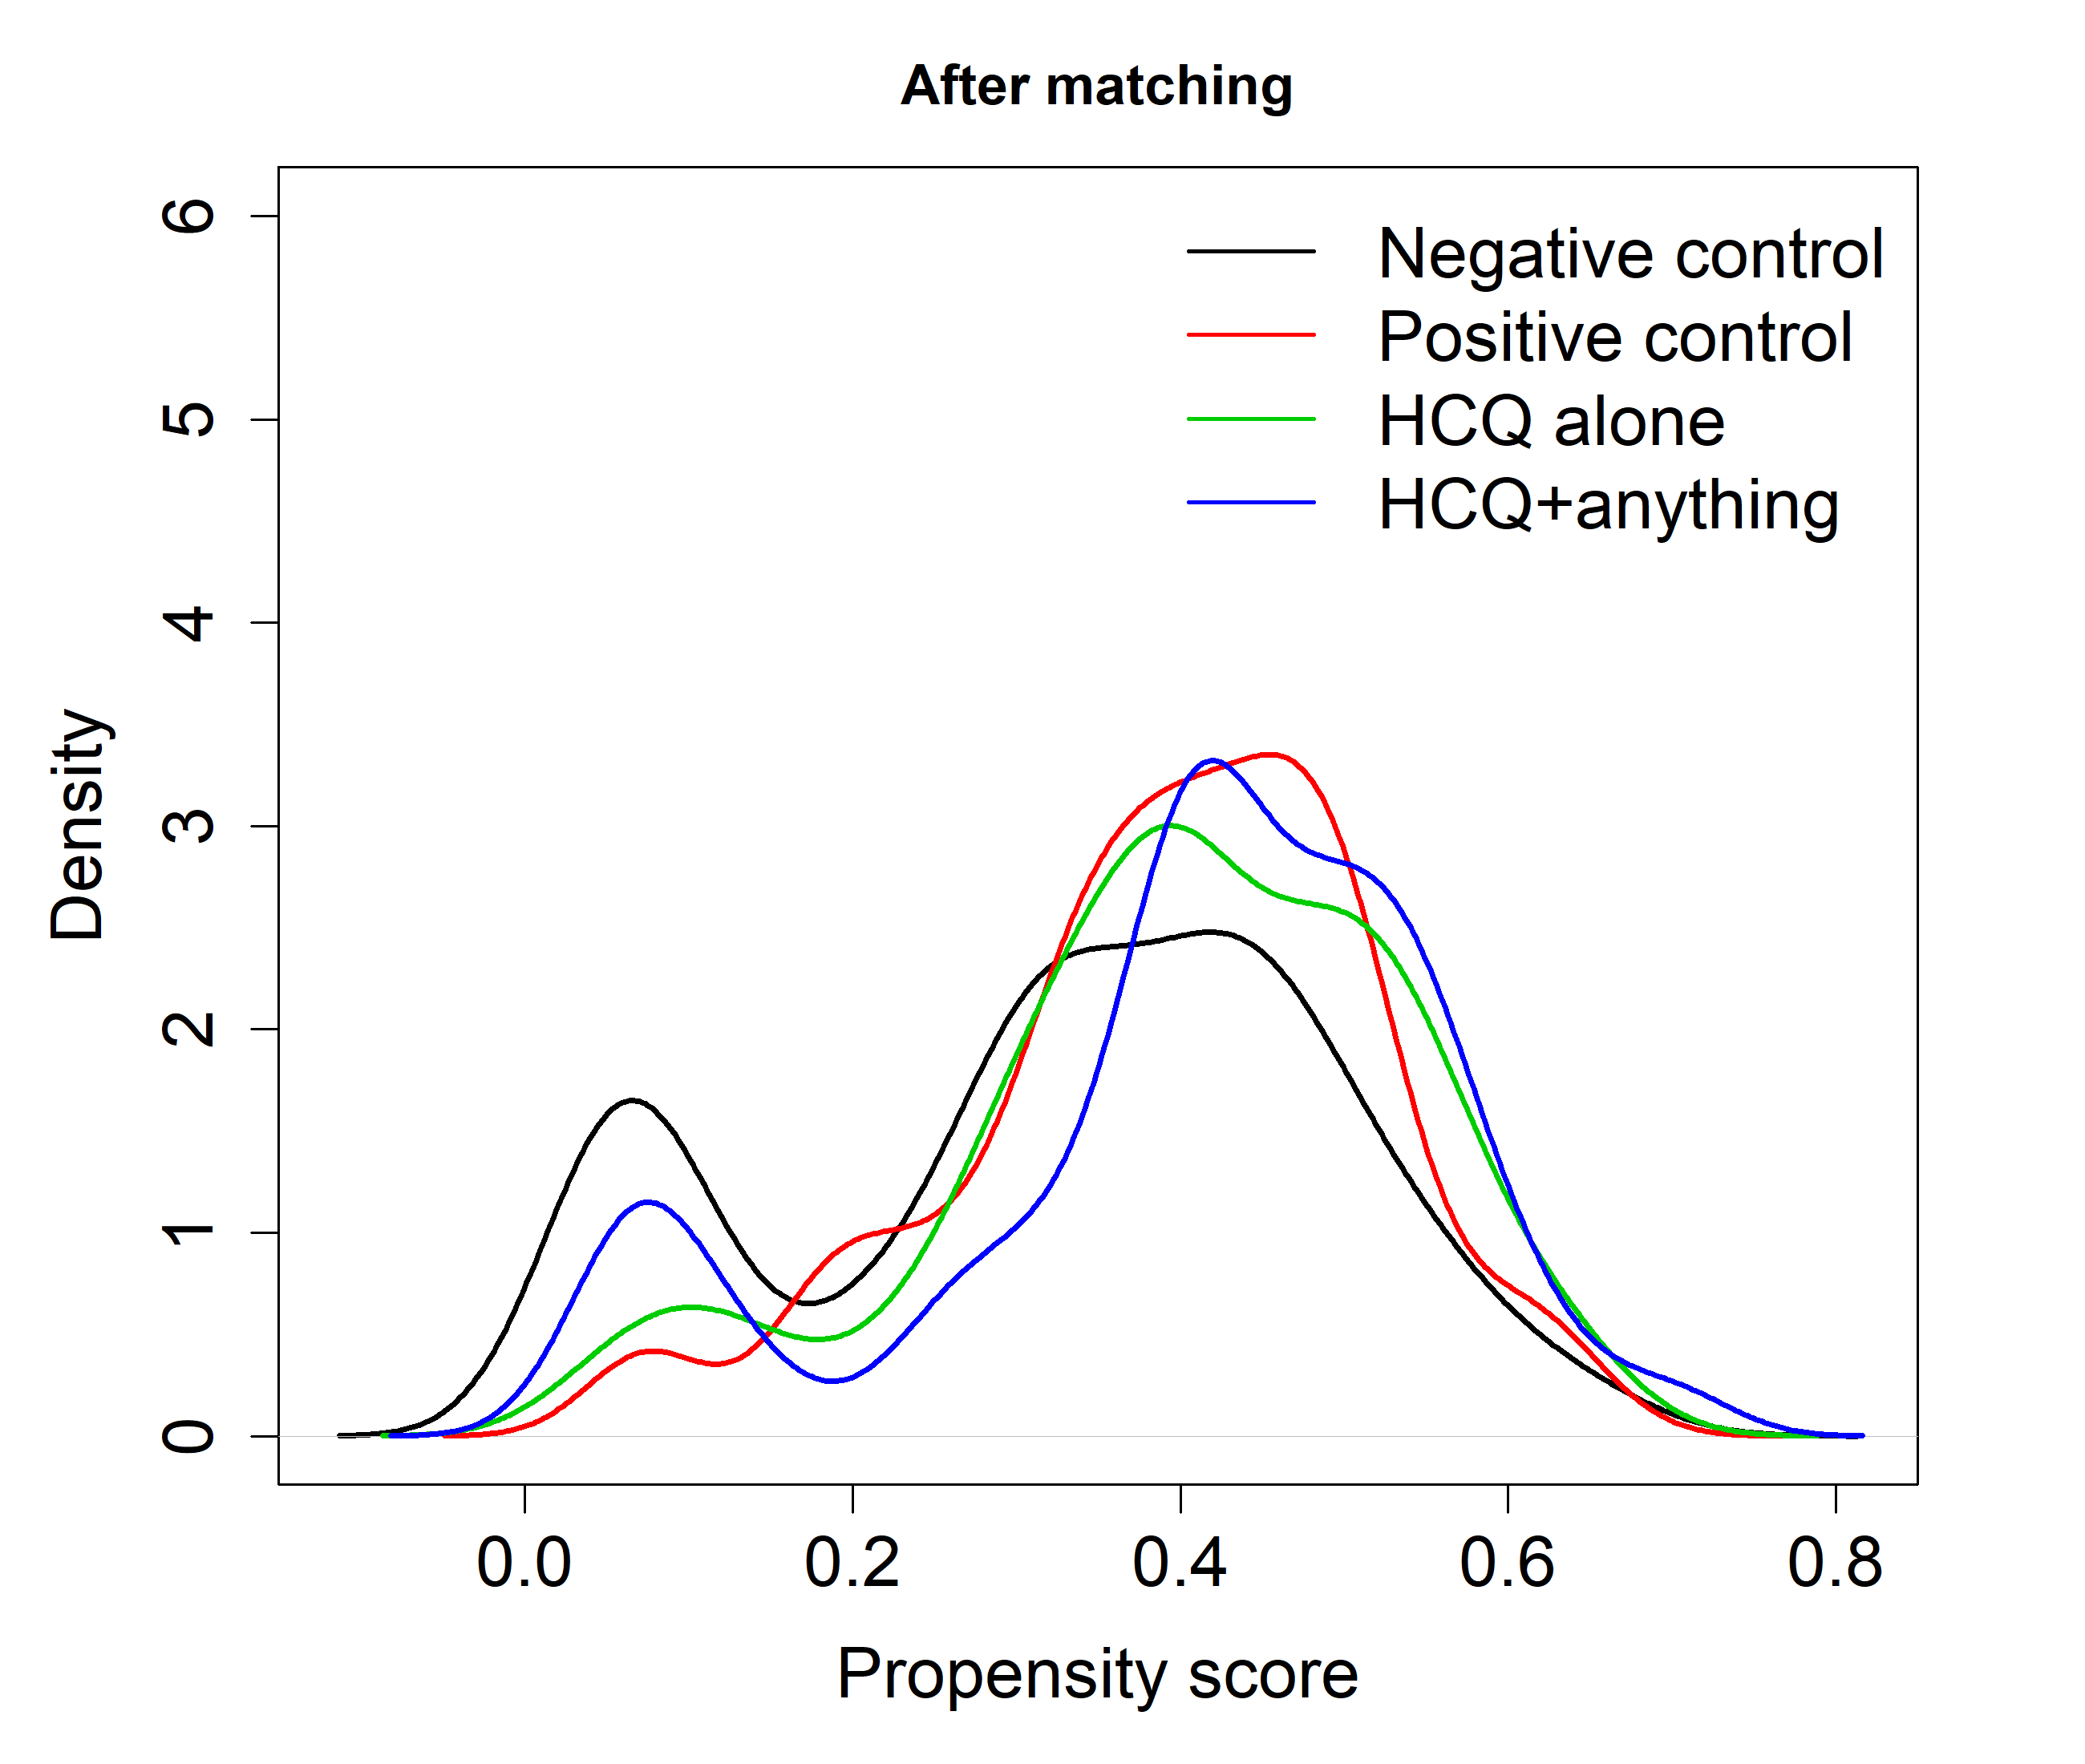


**Supplemental Figure S4: Determination of standard deviation for propensity score matching**. Loss of events (mortality) and maximum mean difference of propensity scores between the four treatment groups, which are obtained from two-group propensity score matching using the nearest-neighbor method with a 1:2 ratio (treated units: control units) and different multipliers of standard deviation.


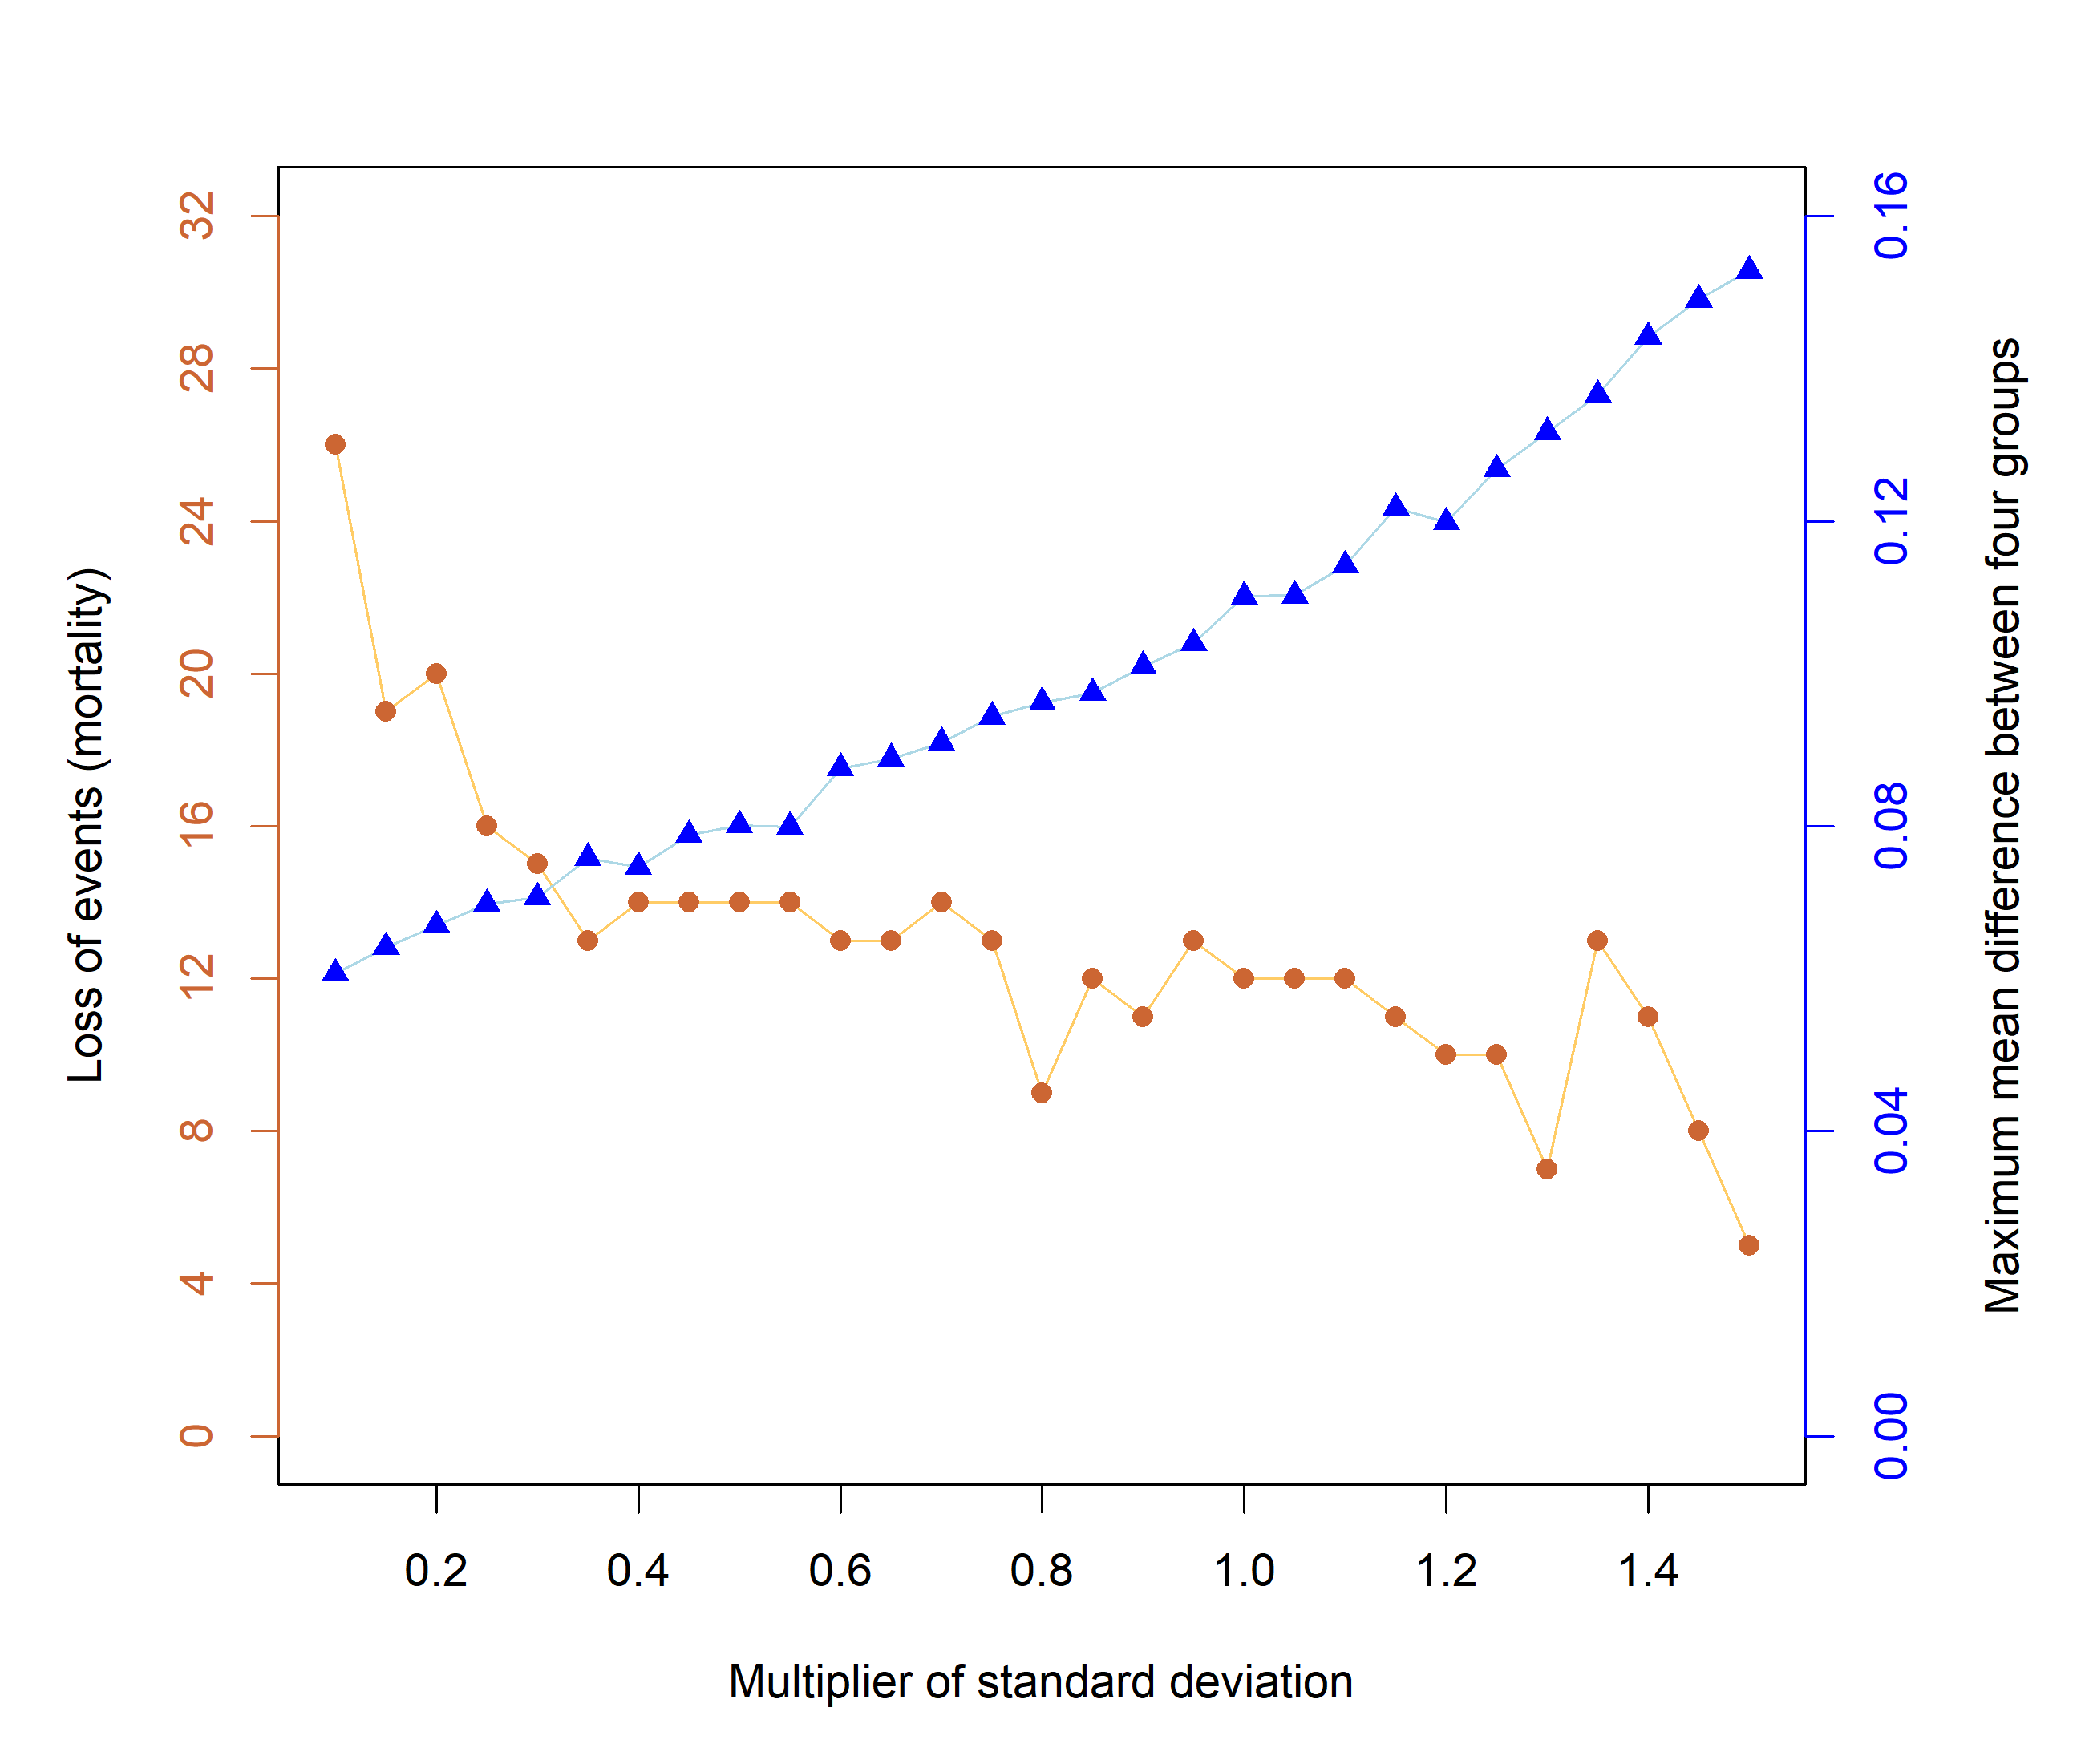

Supplement: 21598290cd200941-sup-246371_2_supp_6437508_qdqzl1.docx [file 21598290cd200941-sup-246371_2_supp_6437508_qdqzl1.docx]
